# Supplementary material for: Nestling Diet of Two Sympatric Insectivorous Passerines in Different Habitats—A Metabarcoding Study
Source: MDPI journal article supplement (doi:10.3390/birds5010005), 2024-01-23
Supplement: s1 [file s1]

## Supplementary Material

|                   | Contents                                                                                                                                                                         | Page |
|-------------------|----------------------------------------------------------------------------------------------------------------------------------------------------------------------------------|------|
| <b>Table S1</b>   | Sample sizes of successfully sequenced samples (see Table 1), separately for the different study sites in each habitat type. From each tree, two branches were cut and analysed. | 3    |
| <b>Table S2</b>   | Tree composition among the three habitats. Dominant tree species are underlined and sampled tree species are marked in bold.                                                     | 4    |
| <b>Figures S1</b> | Aerial images of the study sites via Google Earth                                                                                                                                | 5    |
| <b>Table S3</b>   | Overview of primers and Annealing temperature                                                                                                                                    | 11   |
| <b>Figure S2</b>  | Primer comparison by number of detected species in nestling faecal samples                                                                                                       | 11   |
| <b>Table S4</b>   | Sample size nestling faeces from breeding season 2018                                                                                                                            | 12   |
| <b>Table S5</b>   | Arboreal arthropod composition among habitats in breeding season 2019 with number of individuals                                                                                 | 13   |
| <b>Table S6</b>   | Ambiguous parataxonomic units (PU) of arboreal arthropod samples                                                                                                                 | 18   |
| <b>Table S7</b>   | Diet composition in nestling faeces concerning Lepidoptera with prevalence and frequencies of occurrence                                                                         | 21   |
| <b>Table S8</b>   | Diet composition in nestling faeces concerning other arthropods with prevalence and frequencies of occurrence                                                                    | 25   |
| <b>Table S9</b>   | Biodiversity of all dietary components among habitats on species level                                                                                                           | 28   |
| <b>Figure S3</b>  | NMDS ordinations of Blue Tit diet components                                                                                                                                     | 29   |
| <b>Figure S4</b>  | NMDS ordinations of Great Tit diet components                                                                                                                                    | 32   |
| <b>Table S10</b>  | Comparison of biodiversity in diet composition between tit species                                                                                                               | 35   |
| <b>Figure S5</b>  | NMDS ordinations of nestling diet components between Blue and Great Tits                                                                                                         | 36   |
| <b>Table S11</b>  | Output of Fisher's exact test for differences in diet composition between tit species                                                                                            | 39   |
| <b>Table S12</b>  | Biodiversity of diet composition among habitats on species level grouped by Lepidoptera and other arthropods                                                                     | 40   |
| <b>Table S13</b>  | Output of Permutational Multivariate Analysis of Variance (PERMANOVA)                                                                                                            | 41   |

|                  |                                                                            |    |
|------------------|----------------------------------------------------------------------------|----|
| <b>Figure S6</b> | NMDS ordination of arboreal arthropod communities among different habitats | 42 |
|------------------|----------------------------------------------------------------------------|----|

|                  |                                                                              |    |
|------------------|------------------------------------------------------------------------------|----|
| <b>Table S14</b> | Frequencies of occurrence of arboreal arthropod and Blue Tit diet components | 43 |
|------------------|------------------------------------------------------------------------------|----|

|                  |                                                                               |    |
|------------------|-------------------------------------------------------------------------------|----|
| <b>Table S15</b> | Frequencies of occurrence of arboreal arthropod and Great Tit diet components | 44 |
|------------------|-------------------------------------------------------------------------------|----|

| <b>Table S1</b> Sample sizes of successfully sequenced samples (see Table 1), separately for the different study sites in each habitat type. From each tree, two branches were cut and analysed. |                  |                |                   |                 |              |
|--------------------------------------------------------------------------------------------------------------------------------------------------------------------------------------------------|------------------|----------------|-------------------|-----------------|--------------|
|                                                                                                                                                                                                  | Blue Tit samples | Blue Tit nests | Great Tit samples | Great Tit nests | Tree samples |
| <b>forest</b>                                                                                                                                                                                    | <b>17</b>        | <b>11</b>      | <b>19</b>         | <b>10</b>       |              |
| F1                                                                                                                                                                                               | 10               | 6              | 10                | 5               |              |
| F2                                                                                                                                                                                               | 7                | 5              | 9                 | 5               | 5            |
| <b>orchard</b>                                                                                                                                                                                   | <b>19</b>        | <b>10</b>      | <b>20</b>         | <b>10</b>       |              |
| O1                                                                                                                                                                                               | 8                | 2              | 4                 | 2               |              |
| O2                                                                                                                                                                                               | 7                | 5              | 11                | 5               | 6            |
| O3                                                                                                                                                                                               | 2                | 1              | 0                 | 0               |              |
| O4                                                                                                                                                                                               | 2                | 2              | 5                 | 3               |              |
| <b>urban</b>                                                                                                                                                                                     | <b>20</b>        | <b>11</b>      | <b>18</b>         | <b>12</b>       |              |
| AF                                                                                                                                                                                               | 12               | 6              | 12                | 8               | 6            |
| BOT                                                                                                                                                                                              | 0                | 0              | 2                 | 2               |              |
| HBR                                                                                                                                                                                              | 8                | 5              | 4                 | 2               |              |
| <b>SUM</b>                                                                                                                                                                                       | <b>56</b>        | <b>32</b>      | <b>57</b>         | <b>32</b>       |              |

**Table S2** Tree composition among the three habitats. Dominant tree species are underlined, and sampled tree species are marked in bold.

| Forest                        | Orchard                               | Urban                                 |
|-------------------------------|---------------------------------------|---------------------------------------|
| <i>Betula pendula</i>         | <i>Acer compestre</i>                 | <i>Acer monspessulanum</i>            |
| <i>Carpinus betulus</i>       | <i>Aesculus hippocastanum</i>         | <i>Acer platanoides</i>               |
| <b><u>Fagus sylvatica</u></b> | <i>Fraxinus excelsior</i>             | <i>Acer pseudoplatanus</i>            |
| <i>Pinus sylvestris</i>       | <i>Juglans regia</i>                  | <b><i>Betula pendula</i></b>          |
| <i>Quercus petraea</i>        | <b><u>Malus domestica</u></b>         | <i>Chamaecyparis</i> sp.              |
| <b><i>Quercus robur</i></b>   | <b><i>Prunus avium/P. cerasus</i></b> | <i>Fagus sylvatica</i>                |
|                               | <i>Prunus x domestica</i>             | <i>Fraxinus excelsior</i>             |
|                               | <i>Pyrus communis</i>                 | <i>Ginkgo biloba</i>                  |
|                               | <i>Sorbus aucuparia</i>               | <i>Liquidambar styraciflua</i>        |
|                               |                                       | <b><i>Malus domestica</i></b>         |
|                               |                                       | <i>Phellodendron japonicum</i>        |
|                               |                                       | <i>Picea abies</i>                    |
|                               |                                       | <i>Pinus sylvestris</i>               |
|                               |                                       | <i>Platanus x acerifolia</i>          |
|                               |                                       | <i>Platanus x hispanica</i>           |
|                               |                                       | <b><i>Populus alba</i></b>            |
|                               |                                       | <b><i>Prunus avium/P. cerasus</i></b> |
|                               |                                       | <i>Pseudotsuga menziesii</i>          |
|                               |                                       | <i>Pterocarya fraxinifolia</i>        |
|                               |                                       | <i>Quercus cerris</i>                 |
|                               |                                       | <b><i>Quercus petraea</i></b>         |
|                               |                                       | <i>Quercus robur</i>                  |
|                               |                                       | <i>Quercus rubra</i>                  |
|                               |                                       | <i>Sequoiadendron giganteum</i>       |
|                               |                                       | <i>Sorbus aucuparia</i>               |
|                               |                                       | <i>Sorbus torminalis</i>              |
|                               |                                       | <i>Taxus baccata</i>                  |
|                               |                                       | <i>Thuja</i> sp.                      |

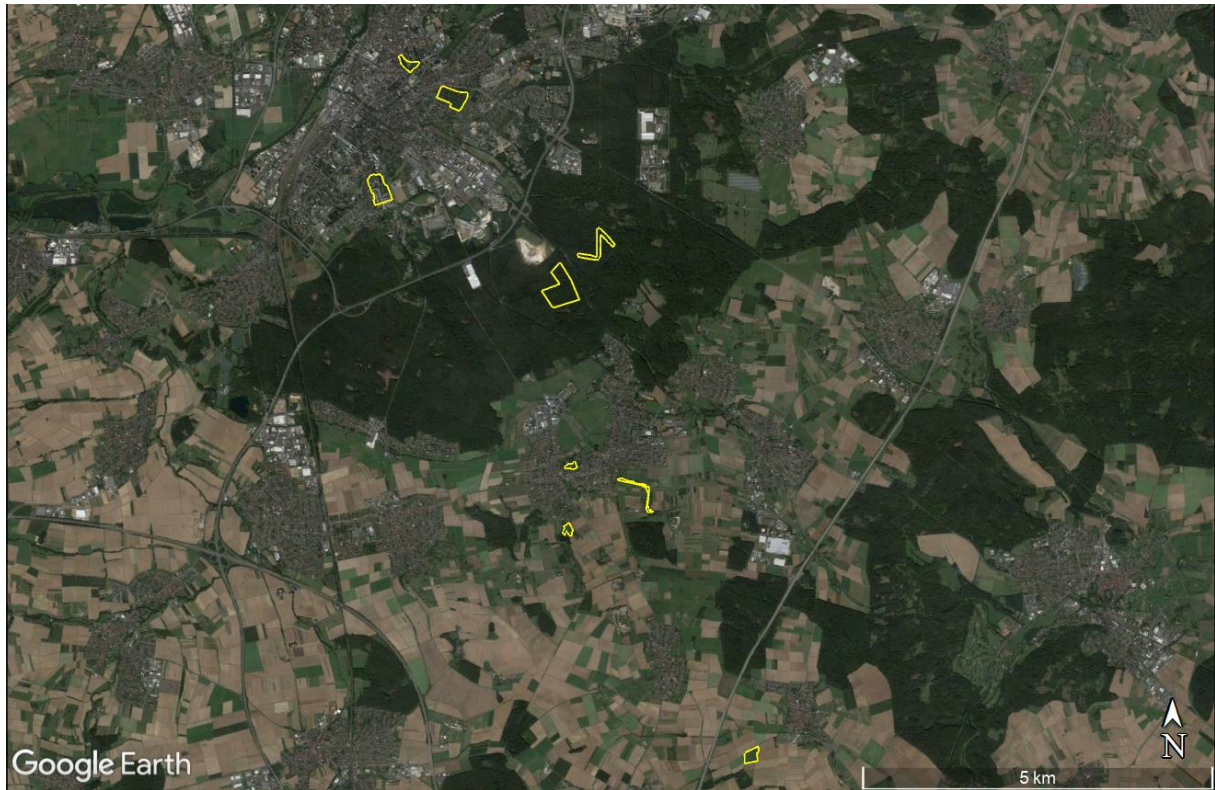

Figure S1a Aerial view of all study sites (outlined in yellow) in their geographical arrangement (3 urban sites in the northwest, 2 forest sites in the centre and 4 orchard sites in the centre to southeast). Photo was created with Google Earth (date: 8/2019).

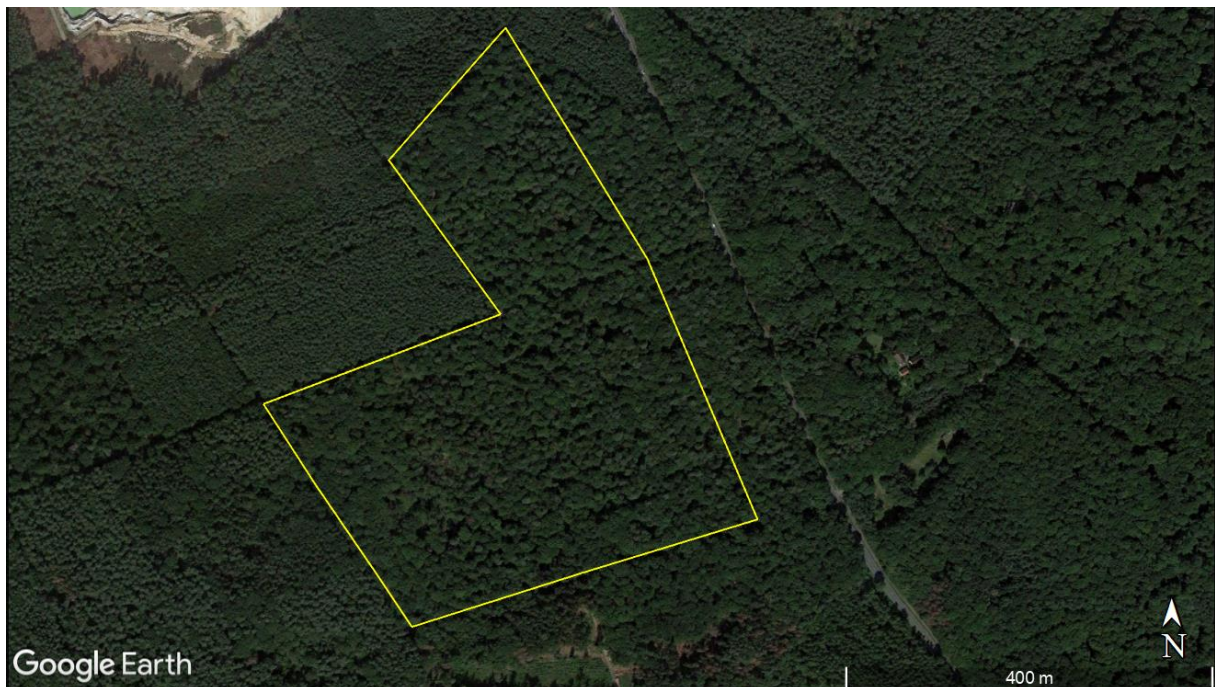

Figure S1b Aerial view of the first forest site (F1, outlined in yellow) with a road in the east bisecting it from the second forest site. Photo was created with Google Earth (date: 8/2019).



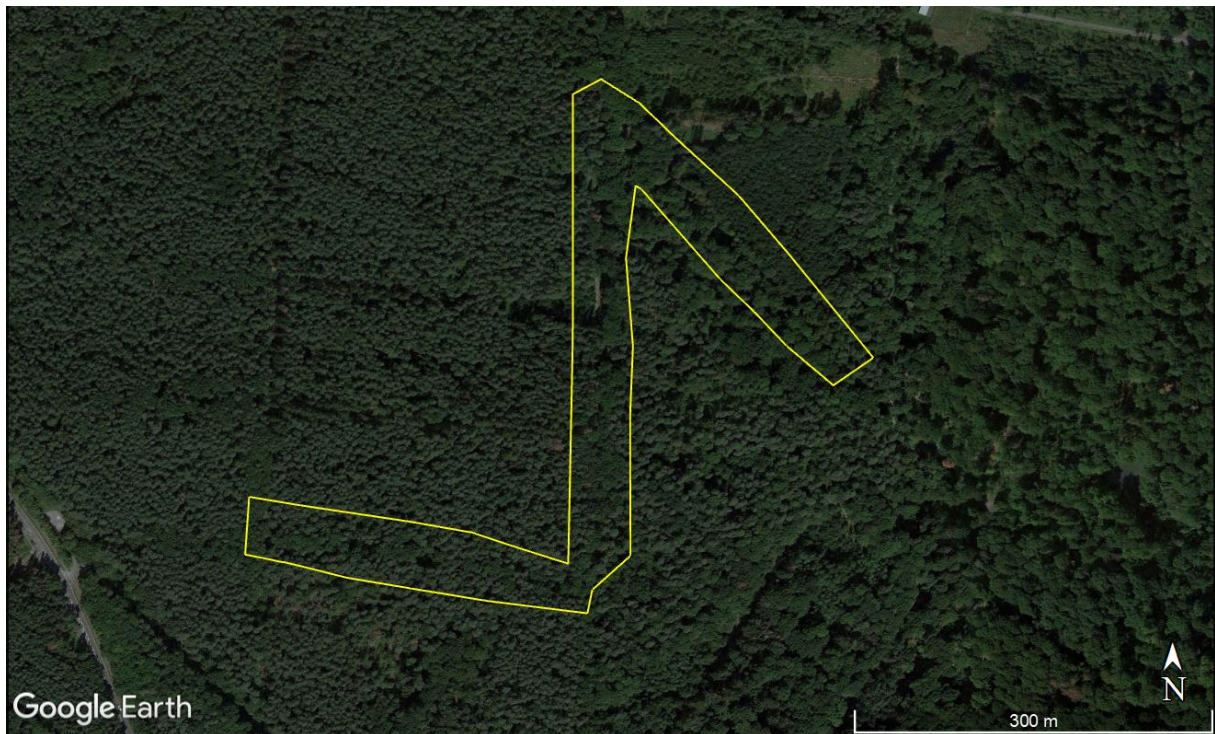

Figure S1c Aerial view of the second forest site (F2, outlined in yellow) with a road in the southwest bisecting it from the first forest site. Photo was created with Google Earth (date: 8/2019).

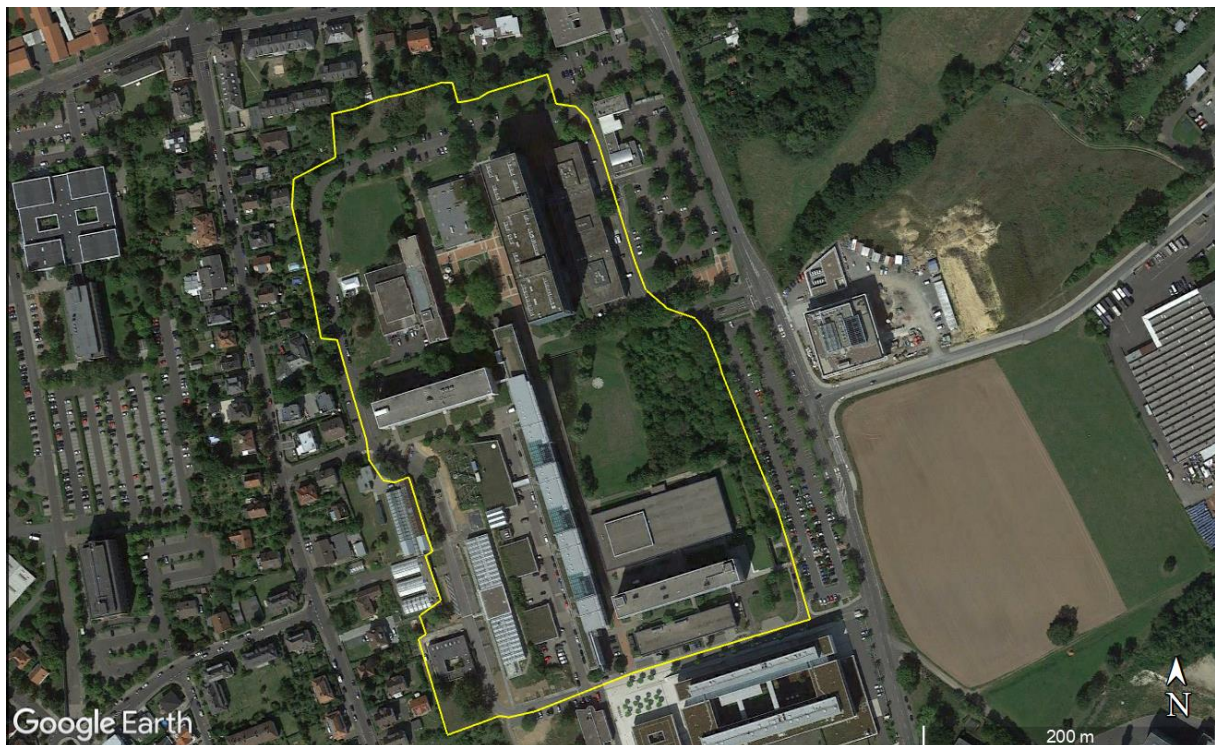

Figure S1d Aerial view of the urban site HBR: campus of natural sciences (outlined in yellow). on the eastern side of the campus beyond an intersecting road, further managed green spaces and an isolated patch of arable land. This site showed the lowest tree density. Photo was created with Google Earth (date: 8/2019).



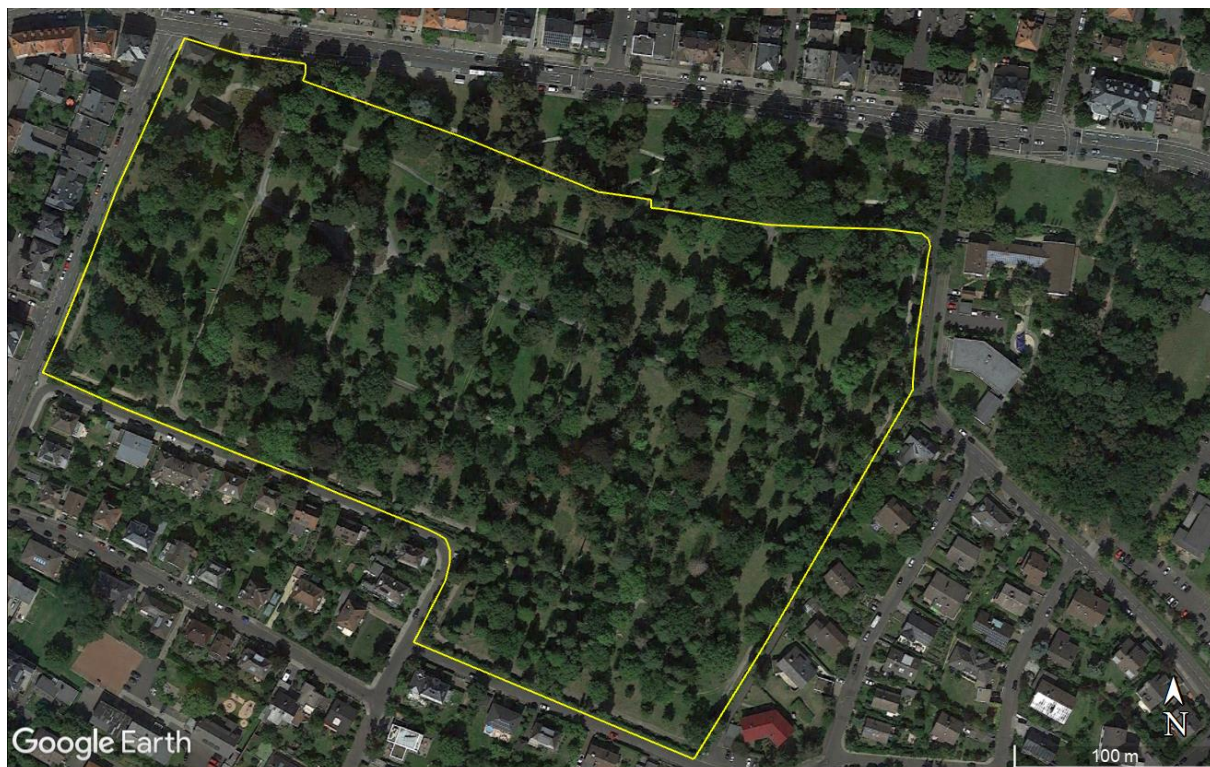

Figure S1e Aerial view of the urban site AF: urban park 'Alter Friedhof' formerly used as a cemetery (outlined in yellow) enclosed within the city centre. Photo was created with Google Earth (date: 8/2019).

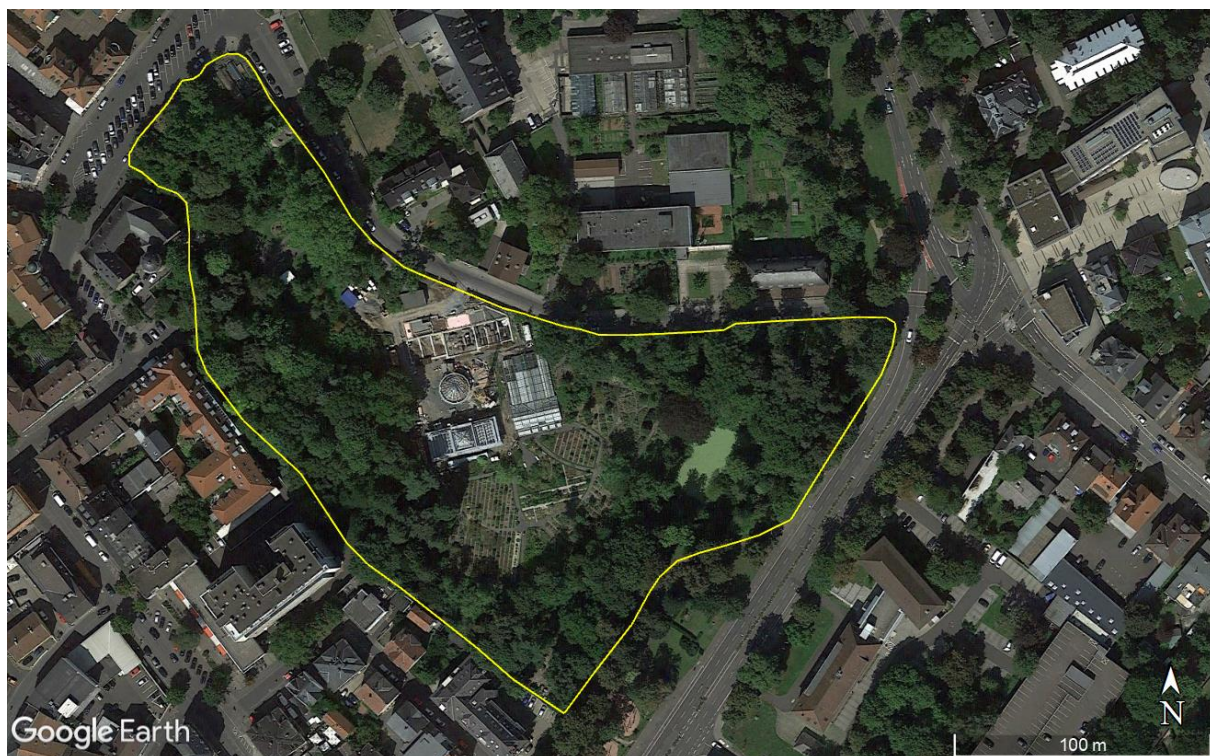

Figure S1f Aerial view of the urban site BOT: the botanical garden of the university (outlined in yellow) enclosed within the city centre. Photo was created with Google Earth (date: 8/2019).



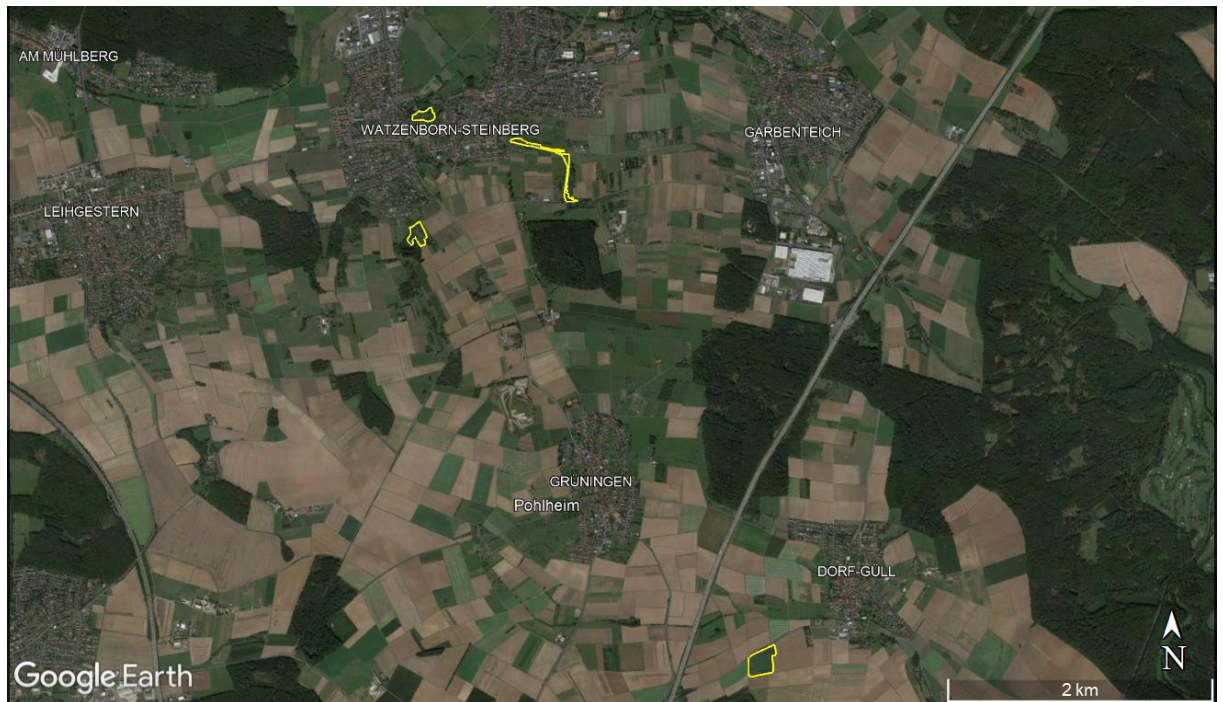

Figure S1g Aerial view of the four orchard sites (outlined in yellow) in their geographical arrangement within districts of the town Pohlheim. Photo was created with Google Earth (date: 8/2019).

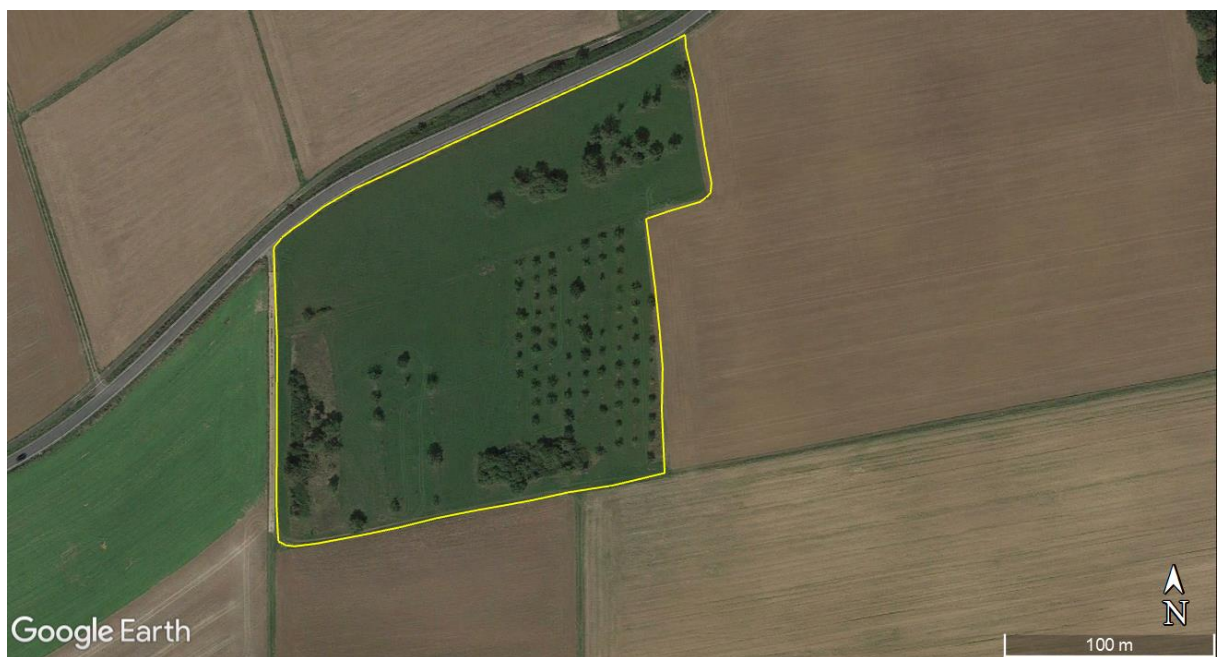

Figure S1h Aerial view of the orchard site O1 (outlined in yellow) close to the district Dorf-Güll alongside a road and within a matrix of arable land. Photo was created with Google Earth (date: 8/2019).



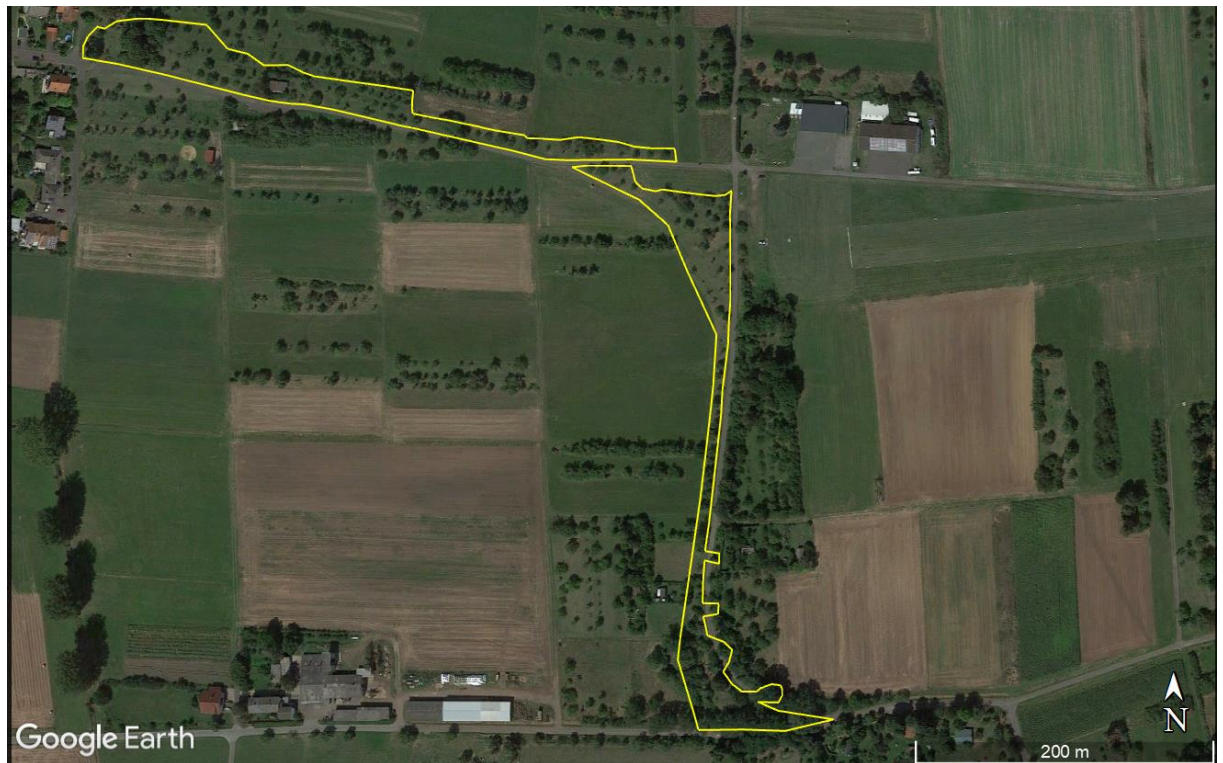

Figure S1i Aerial view of the orchard site O2 (outlined in yellow) at the outskirts of the district Watzenborn-Steinberg within a matrix of arable land and other orchards. Photo was created with Google Earth (date: 8/2019).

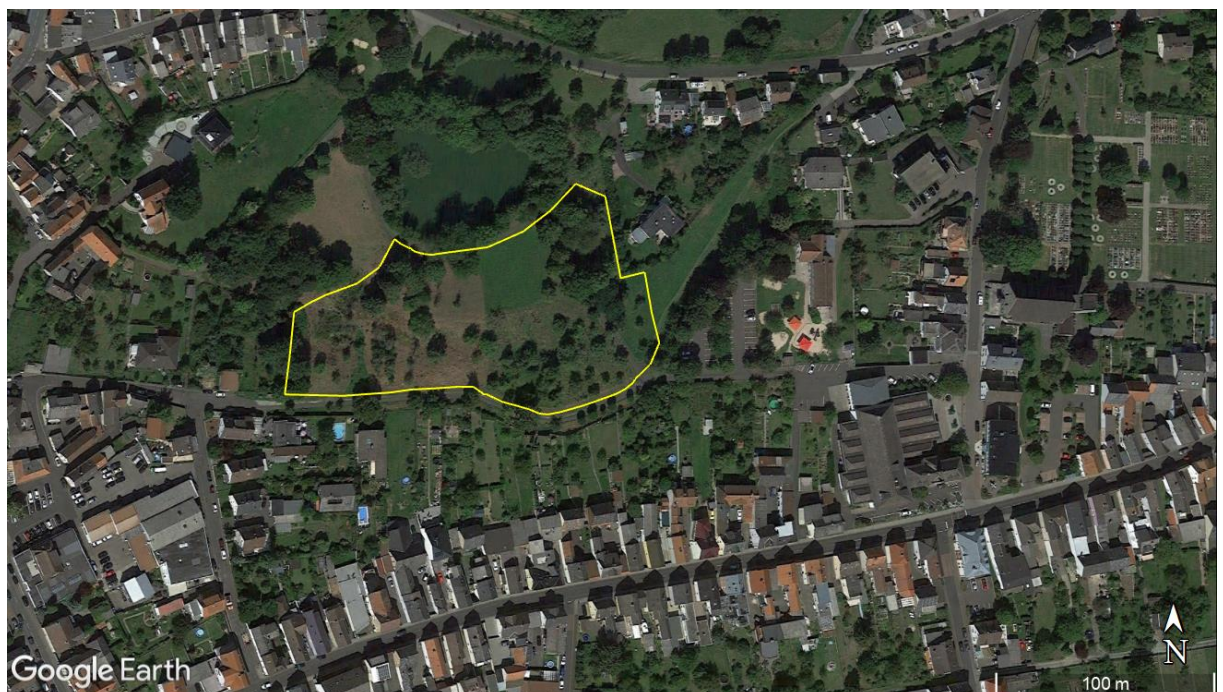

Figure S1k Aerial view of the orchard site O3 (outlined in yellow) within the centre of the district Watzenborn-Steinberg surrounded by urban gardens and by a pond at the northern edge. Photo was created with Google Earth (date: 8/2019).



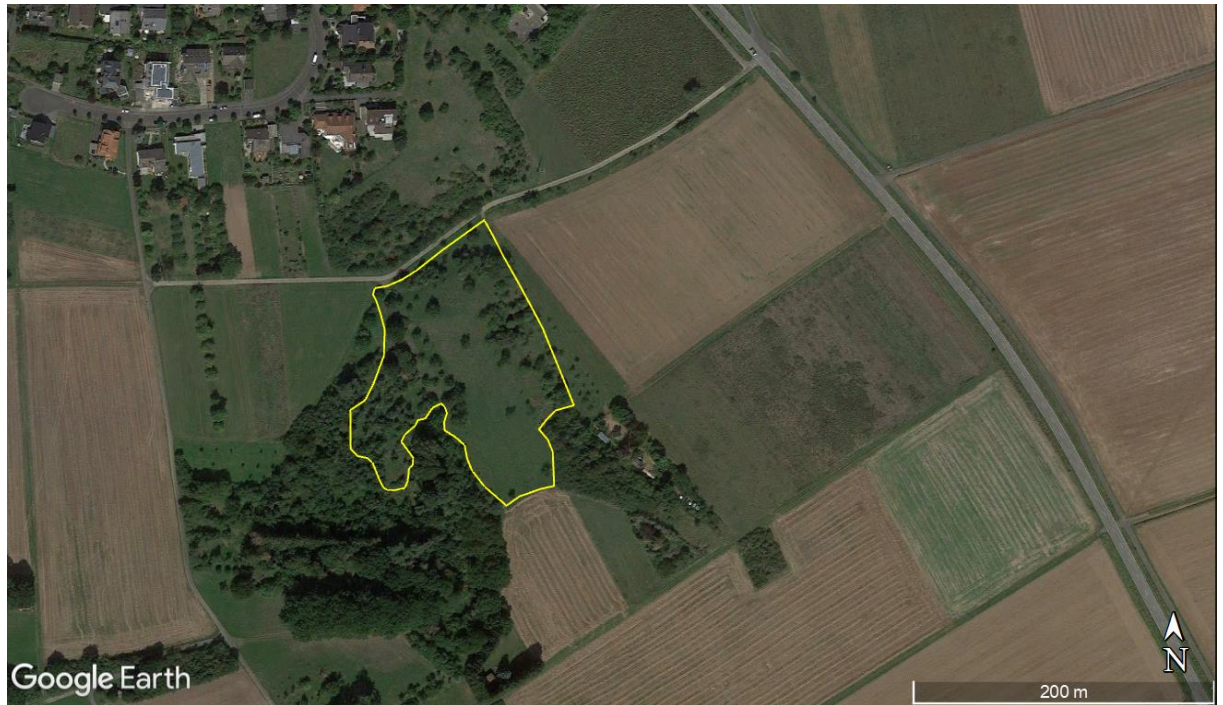

Figure S1l Aerial view of the orchard site O4 (outlined in yellow) at the southern edge of the district Watzenborn-Steinberg surrounded by urban gardens and woodland and arable land. Photo was created with Google Earth (date: 8/2019).

**Table S3** Overview of primers we used in this study. Primers are listed with their Label (as named in this study), sequence, expected fragment size and thermocycler conditions for adapter PCR

| Label   | Primer     | Sequence (5' - 3')            | Reference            | Fragment size (bp) | Thermocycler conditions                                                                          |
|---------|------------|-------------------------------|----------------------|--------------------|--------------------------------------------------------------------------------------------------|
| ZBJ-Art | ZBJ-ArtF1c | AGATATTGGAACWTTATATTTTATTTTGG | Zeale et al. (2011)  | 157                | 98°C for 2 min; 38 cycles of:<br>98°C for 10 s, 58°C for 30 s,<br>72°C for 30 s; 72°C for 2 min  |
|         | ZBJ-ArtR2c | WACTAATCAATTWCCAAATCCTCC      |                      |                    |                                                                                                  |
| ANML    | LCO1490    | GGTCAACAAATCATAAAGATATTGG     | Folmer et al. (1994) | 180                | 95°C for 2 min; 35 cycles of:<br>94°C for 30 s, 45°C for 30 s,<br>72°C for 60 s; 72°C for 10 min |
|         | COI-CFMRa  | GGWACTAATCAATTTCCTCAATCC      | Jusino et al. (2019) |                    |                                                                                                  |

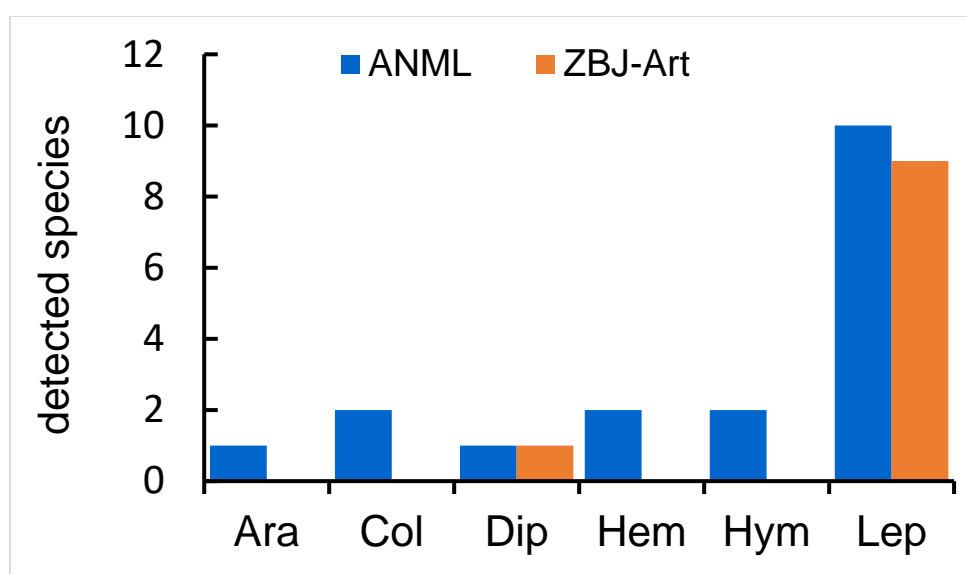

**Figure S2** Primer comparison of the no. of detected species in nestling faecal samples of Blue and Great Tits (n = 15) with primer sets ANML (blue) and ZBJ-Art (orange). Detected species were grouped by taxonomic orders (Ara = Araneae, Col = Coleoptera, Dip = Diptera, Hem = Hemiptera, Hym = Hymenoptera, Lep = Lepidoptera)



**Table S4** Sample sizes of nestling faeces from breeding season 2018 in each processing step amplified with ZBJ-Art adapter primers and index primers. Nest numbers of final samples are given in brackets

| sample processing steps                                  | Blue Tit |         |       | Great Tit |         |        |
|----------------------------------------------------------|----------|---------|-------|-----------|---------|--------|
|                                                          | forest   | orchard | urban | forest    | orchard | urban  |
| 1) PCR products in NGS Library for sequencing            | 20       | 19      | 19    | 17        | 19      | 19     |
| 2) successfully sequenced samples                        | 20       | 17      | 11    | 17        | 15      | 16     |
| 3) after manual filtering steps to avoid false positives | 4 (4)    | 7 (6)   | 6 (5) | 7 (5)     | 4 (2)   | 12 (7) |

**Table S5** Arboreal arthropod composition among habitats collected in the breeding season of 2019 with regard to the number of individuals. Arthropods were identified to the lowest possible taxonomic level (excluding ambiguous and undetermined parataxonomical units)

| Common name | Class      | Order      | Family        | Species                      | no. of individuals |         |       |
|-------------|------------|------------|---------------|------------------------------|--------------------|---------|-------|
|             |            |            |               |                              | forest             | orchard | urban |
| Spiders     | Arachnida  | Araneae    | Anyphaenidae  | <i>Anyphaena accentuata</i>  | 3                  | 0       | 0     |
|             | Arachnida  | Araneae    | Clubionidae   | <i>Clubiona brevipes</i>     | 0                  | 1       | 0     |
|             | Arachnida  | Araneae    | Clubionidae   | <i>Clubiona compta</i>       | 1                  | 0       | 0     |
|             | Arachnida  | Araneae    | Dictynidae    | <i>Lathys humilis</i>        | 0                  | 2       | 3     |
|             | Arachnida  | Araneae    | Linyphiidae   | <i>Linyphia triangularis</i> | 1                  | 0       | 0     |
|             | Arachnida  | Araneae    | Linyphiidae   | <i>Nerienne peltata</i>      | 4                  | 0       | 0     |
|             | Arachnida  | Araneae    | Philodromidae | <i>Philodromus albidus</i>   | 7                  | 4       | 1     |
|             | Arachnida  | Araneae    | Philodromidae | <i>Philodromus buxi</i>      | 0                  | 1       | 0     |
|             | Arachnida  | Araneae    | Philodromidae | <i>Philodromus collinus</i>  | 1                  | 0       | 0     |
|             | Arachnida  | Araneae    | Philodromidae | <i>Philodromus praedatus</i> | 0                  | 3       | 0     |
|             | Arachnida  | Araneae    | Salticidae    | <i>Ballus chalybeius</i>     | 0                  | 1       | 0     |
|             | Arachnida  | Araneae    | Theridiidae   | <i>Paidiscura pallens</i>    | 9                  | 4       | 0     |
|             | Arachnida  | Araneae    | Theridiidae   | <i>Phylloneta impressa</i>   | 1                  | 7       | 6     |
|             | Arachnida  | Araneae    | Theridiidae   | <i>Platnickina tinctoria</i> | 1                  | 0       | 0     |
| Araneae     |            |            |               |                              | 28                 | 23      | 10    |
| total       |            |            |               |                              |                    |         |       |
| Millipedes  | Diplopoda  | Polyxenida | Polyxenidae   | <i>Polyxenus lagura</i>      | 0                  | 1       | 0     |
| Springtails | Entognatha | Collembola | Entomobryidae | <i>Entomobrya nivalis</i>    | 1                  | 0       | 0     |



|                   |         |                      |               |                                |    |    |    |
|-------------------|---------|----------------------|---------------|--------------------------------|----|----|----|
| Beetles           | Insecta | Coleoptera           | Anobiidae     | <i>Anobium costatum</i>        | 1  | 0  | 0  |
|                   | Insecta | Coleoptera           | Coccinellidae | <i>Stethorus punctillum</i>    | 0  | 1  | 1  |
|                   | Insecta | Coleoptera           | Elateridae    | <i>Agriotes acuminatus</i>     | 1  | 0  | 0  |
|                   | Insecta | Coleoptera           | Latridiidae   | <i>Corticaria gibbosa</i>      | 3  | 13 | 5  |
|                   | Insecta | Coleoptera           | Melyridae     | <i>Dasytes aeratus</i>         | 0  | 1  | 0  |
|                   | Insecta | Coleoptera           | Melyridae     | <i>Sphinginus lobatus</i>      | 0  | 0  | 2  |
|                   | Insecta | Coleoptera           | Nitidulidae   | <i>Brassicogethes aeneus</i>   | 0  | 0  | 1  |
|                   | Insecta | Coleoptera           | Scaptiidae    | <i>Anaspis maculata</i>        | 0  | 0  | 1  |
| Weevils           | Insecta | Coleoptera           | Apionidae     | <i>Protapion fulvipes</i>      | 0  | 1  | 0  |
|                   | Insecta | Coleoptera           | Curculionidae | <i>Anthonomus rectirostris</i> | 0  | 0  | 1  |
|                   | Insecta | Coleoptera           | Curculionidae | <i>Dorytomus tortrix</i>       | 0  | 0  | 1  |
|                   | Insecta | Coleoptera           | Curculionidae | indet.                         | 0  | 0  | 3  |
|                   | Insecta | Coleoptera           | Curculionidae | <i>Phyllobius roboretanus</i>  | 0  | 12 | 0  |
|                   | Insecta | Coleoptera           | Curculionidae | <i>Polydrusus marginatus</i>   | 5  | 0  | 0  |
|                   | Insecta | Coleoptera           | Curculionidae | <i>Rhamphus oxyacanthae</i>    | 0  | 7  | 0  |
|                   | Insecta | Coleoptera           | Curculionidae | <i>Tychius meliloti</i>        | 1  | 0  | 0  |
| <b>Coleoptera</b> |         |                      |               |                                | 11 | 35 | 15 |
| <b>total</b>      |         |                      |               |                                |    |    |    |
| Flies             | Insecta | Diptera (Brachycera) | Hybotidae     | <i>Platypalpus agilis</i>      | 0  | 0  | 1  |
|                   | Insecta | Diptera (Brachycera) | Pipunculidae  | <i>Jassidophaga fasciata</i>   | 0  | 0  | 1  |
|                   | Insecta | Diptera (Brachycera) | Platypezidae  | <i>Lindneromyia dorsalis</i>   | 0  | 0  | 1  |
|                   | Insecta | Diptera (Brachycera) | Syrphidae     | <i>Syrphus</i> sp.             | 0  | 5  | 0  |

|                |         |                      |               |                                   |   |    |    |
|----------------|---------|----------------------|---------------|-----------------------------------|---|----|----|
| Midges         | Insecta | Diptera (Nematocera) | Cecidomyiidae | <i>Contarinia</i> sp.             | 0 | 0  | 1  |
|                | Insecta | Diptera (Nematocera) | Chironomidae  | indet.                            | 0 | 1  | 0  |
| Gnats          | Insecta | Diptera (Nematocera) | Sciaridae     | <i>Bradysia polonica</i>          | 1 | 0  | 0  |
| <b>Diptera</b> |         |                      |               |                                   | 1 | 6  | 4  |
| <b>total</b>   |         |                      |               |                                   |   |    |    |
| Aphids         | Insecta | Hemiptera            | indet.        | indet.                            | 0 | 1  | 0  |
|                | Insecta | Hemiptera            | Aphididae     | <i>Callipterinella calliptera</i> | 0 | 0  | 1  |
|                | Insecta | Hemiptera            | Aphididae     | <i>Dysaphis plantaginea</i>       | 0 | 30 | 2  |
|                | Insecta | Hemiptera            | Aphididae     | <i>Dysaphis</i> sp.               | 0 | 5  | 23 |
|                | Insecta | Hemiptera            | Aphididae     | <i>Euceraphis betulae</i>         | 0 | 0  | 37 |
|                | Insecta | Hemiptera            | Aphididae     | indet.                            | 1 | 0  | 0  |
|                | Insecta | Hemiptera            | Aphididae     | <i>Myzus cerasi</i>               | 0 | 5  | 0  |
|                | Insecta | Hemiptera            | Aphididae     | <i>Myzus</i> sp.                  | 0 | 1  | 7  |
|                | Insecta | Hemiptera            | Aphididae     | <i>Phyllaphis fagi</i>            | 4 | 0  | 0  |
| Leafhoppers    | Insecta | Hemiptera            | Cicadellidae  | indet.                            | 1 | 0  | 8  |
|                | Insecta | Hemiptera            | Cicadellidae  | <i>Issus</i> sp.                  | 2 | 0  | 0  |
|                | Insecta | Hemiptera            | Cicadellidae  | <i>Issus coleoptratus</i>         | 1 | 0  | 0  |
|                | Insecta | Hemiptera            | Cicadellidae  | <i>Oncopsis</i> sp.               | 0 | 0  | 5  |
| Planthoppers   | Insecta | Hemiptera            | Cixiidae      | indet.                            | 0 | 1  | 0  |
| Bugs           | Insecta | Hemiptera            | Miridae       | <i>Deraeocoris flavilinea</i>     | 0 | 12 | 2  |
|                | Insecta | Hemiptera            | Miridae       | <i>Deraeocoris olivaceus</i>      | 0 | 2  | 0  |
|                | Insecta | Hemiptera            | Miridae       | indet.                            | 0 | 14 | 4  |



|                    |         |             |                |                                  |    |    |     |
|--------------------|---------|-------------|----------------|----------------------------------|----|----|-----|
|                    | Insecta | Hemiptera   | Miridae        | <i>Phylus melanocephalus</i>     | 0  | 0  | 3   |
|                    | Insecta | Hemiptera   | Miridae        | <i>Phytocoris longipennis</i>    | 0  | 1  | 1   |
|                    | Insecta | Hemiptera   | Miridae        | <i>Psallus</i> sp.               | 0  | 0  | 11  |
|                    | Insecta | Hemiptera   | Pentatomidae   | <i>Pentatoma rufipes</i>         | 0  | 2  | 0   |
| <b>Hemiptera</b>   |         |             |                |                                  | 9  | 74 | 104 |
| <b>total</b>       |         |             |                |                                  |    |    |     |
| Parasitoid wasps   | Insecta | Hymenoptera | Bethylidae     | indet.                           | 0  | 1  | 0   |
|                    | Insecta | Hymenoptera | Braconidae     | <i>Dolichogenidea</i> sp.        | 1  | 0  | 0   |
|                    | Insecta | Hymenoptera | Braconidae     | <i>Ephedrus persicae</i>         | 0  | 6  | 0   |
| Gall wasps         | Insecta | Hymenoptera | Cynipidae      | <i>Neuroterus</i> sp.            | 3  | 0  | 0   |
| Ants               | Insecta | Hymenoptera | Formicidae     | <i>Pheidole</i> sp.              | 0  | 8  | 0   |
| Sawflies (larva)   | Insecta | Hymenoptera | Tenthredinidae | <i>Periclista albida</i>         | 1  | 0  | 0   |
| <b>Hymenoptera</b> |         |             |                |                                  | 5  | 15 | 0   |
| <b>total</b>       |         |             |                |                                  |    |    |     |
| Moths              | Insecta | Lepidoptera | Coleophoridae  | <i>Coleophora coracipennella</i> | 0  | 0  | 1   |
|                    | Insecta | Lepidoptera | Coleophoridae  | <i>Coleophora flavipennella</i>  | 0  | 1  | 0   |
|                    | Insecta | Lepidoptera | Erebidae       | <i>Lymantria monacha</i>         | 3  | 0  | 0   |
|                    | Insecta | Lepidoptera | Geometridae    | <i>Agriopsis leucophaearia</i>   | 1  | 0  | 0   |
|                    | Insecta | Lepidoptera | Geometridae    | <i>Agriopsis marginaria</i>      | 8  | 1  | 0   |
|                    | Insecta | Lepidoptera | Geometridae    | <i>Ennomos quercinaria</i>       | 2  | 0  | 0   |
|                    | Insecta | Lepidoptera | Geometridae    | indet.                           | 6  | 0  | 0   |
|                    | Insecta | Lepidoptera | Geometridae    | <i>Operophtera brumata</i>       | 13 | 30 | 8   |

|                    |         |              |               |                                  |     |     |     |
|--------------------|---------|--------------|---------------|----------------------------------|-----|-----|-----|
|                    | Insecta | Lepidoptera  | Lasiocampidae | <i>Malacosoma neustria</i>       | 0   | 1   | 0   |
|                    | Insecta | Lepidoptera  | Noctuidae     | <i>Amphipyra berbera</i>         | 0   | 1   | 0   |
|                    | Insecta | Lepidoptera  | Noctuidae     | <i>Conistra vaccinii</i>         | 1   | 0   | 0   |
|                    | Insecta | Lepidoptera  | Noctuidae     | <i>Eupsilia transversa</i>       | 1   | 0   | 0   |
|                    | Insecta | Lepidoptera  | Noctuidae     | <i>Orthosia cerasi</i>           | 0   | 1   | 0   |
|                    | Insecta | Lepidoptera  | Tortricidae   | <i>Archips xylosteana</i>        | 0   | 2   | 1   |
|                    | Insecta | Lepidoptera  | Tortricidae   | indet.                           | 8   | 168 | 0   |
|                    | Insecta | Lepidoptera  | Yponomeutidae | <i>Yponomeuta malinellus</i>     | 0   | 9   | 0   |
|                    | Insecta | Lepidoptera  | Ypsolophidae  | <i>Ypsolopha parenthesesella</i> | 6   | 0   | 0   |
| <b>Lepidoptera</b> |         |              |               |                                  | 49  | 214 | 10  |
| <b>total</b>       |         |              |               |                                  |     |     |     |
| Crickets           | Insecta | Orthoptera   | Tettigoniidae | indet.                           | 1   | 0   | 0   |
|                    | Insecta | Orthoptera   | Tettigoniidae | <i>Meconema</i> sp.              | 1   | 1   | 0   |
| <b>Orthoptera</b>  |         |              |               |                                  | 2   | 1   | 0   |
| <b>total</b>       |         |              |               |                                  |     |     |     |
| Lice               | Insecta | Psocodea     | Caeciliusidae | <i>Valenzuela flavidus</i>       | 1   | 0   | 0   |
|                    | Insecta | Psocodea     | Ectopsocidae  | <i>Ectopsocus</i> sp.            | 0   | 10  | 7   |
| <b>Psocodea</b>    |         |              |               |                                  | 1   | 10  | 7   |
| <b>total</b>       |         |              |               |                                  |     |     |     |
| Thrips             | Insecta | Thysanoptera | indet.        | indet.                           | 8   | 51  | 2   |
| <b>sum total</b>   |         |              |               |                                  | 115 | 430 | 152 |

**Table S6** Ambiguous parataxonomical units (PU) of collected arboreal arthropod samples that could not be determined definitely with regard to number of individuals for the entire PU in each habitat (highlighted in grey). Listed are respectively PU ID and determined taxa according to nucleotide BLAST results. For taxa determined to species level, accession number is given

| PU_ID            | no. of individuals |         |       | Order       | Family        | Species                     | Query Cover | Identity | Accession no. |
|------------------|--------------------|---------|-------|-------------|---------------|-----------------------------|-------------|----------|---------------|
|                  | forest             | orchard | urban |             |               |                             |             |          |               |
| A31              |                    |         |       | Hemiptera   | Anthocoridae  | <i>Orius minutus</i>        | 95%         | 100%     | KR032186.1    |
| A31              |                    |         |       | Coleoptera  | Curculionidae | <i>Dorytomus</i> sp.        | 65%         | 96%      |               |
| A31              |                    |         |       | Hemiptera   | Anthocoridae  | <i>Orius laticollis</i>     | 85%         | 100%     | KM021961.1    |
| <b>A31 total</b> | 0                  | 2       | 2     |             |               |                             |             |          |               |
| A32              |                    |         |       | Acari       | Eriophyidae   | <i>Aceria</i> sp.           | 87%         | 82%      |               |
| A32 (parasitoid) |                    |         |       | Hymenoptera | Bracconidae   | <i>Peristenus</i> sp.       | 97%         | 96%      |               |
| <b>A32 total</b> | 0                  | 14      | 8     |             |               |                             |             |          |               |
| A36              |                    |         |       | Coleoptera  | Coccinellidae | <i>Harmonia axyridis</i>    | 86%         | 100%     | KM849420.1    |
| A36              |                    |         |       | Coleoptera  | Coccinellidae | <i>Adalia decempunctata</i> | 96%         | 100%     | KU918545.1    |
| <b>A36 total</b> | 0                  | 0       | 2     |             |               |                             |             |          |               |
| A39 (parasitoid) |                    |         |       | Hymenoptera | Bracconidae   | <i>Eadya</i> sp.            | 88%         | 96%      |               |
| A39              |                    |         |       | Heteroptera | Miridae       | <i>Neolygus</i> sp.         | 83%         | 96%      |               |
| <b>A39 total</b> | 0                  | 0       | 5     |             |               |                             |             |          |               |
| A41              |                    |         |       | Hemiptera   | Flatidae      | <i>Metcalfa pruinosa</i>    | 54%         | 100%     | MN609260.1    |
| <b>A41 total</b> | 0                  | 0       | 2     |             |               |                             |             |          |               |



|                  |   |    |   |                |                |                               |        |        |            |
|------------------|---|----|---|----------------|----------------|-------------------------------|--------|--------|------------|
| A64              |   |    |   | Trombidiformes | Tetranychidae  | indet.                        | 88%    | 98%    | MN352957.1 |
| <b>A64 total</b> | 0 | 17 | 0 |                |                |                               |        |        |            |
| A72              |   |    |   | Lepidoptera    | Geometridae    | <i>Operophtera</i> sp.        | 88%    | 97%    |            |
| <b>A72 total</b> | 0 | 1  | 0 |                |                |                               |        |        |            |
| R03              |   |    |   | Lepidoptera    | Geometridae    | <i>Operophtera brumata</i>    | 99%    | 100%   | KP027400.1 |
| R03              |   |    |   | Lepidoptera    | Geometridae    | <i>Agriopsis leucophaeria</i> | 98.0%  | 100.0% | GU654882.1 |
| R03              |   |    |   | Lepidoptera    | Noctuidae      | <i>Orthosia cerasi</i>        | 97.0%  | 99.5%  | HM872477.1 |
| <b>R03 total</b> | 3 | 0  | 1 |                |                |                               |        |        |            |
| R05              |   |    |   | Lepidoptera    | Tortricidae    | <i>Archips xylosteana</i>     | 100.0% | 100.0% | JF703030.1 |
| R05              |   |    |   | Hymenoptera    | Tenthredinidae | <i>Nematus lucens</i>         | 95.0%  | 100.0% | KC975831.1 |
| <b>R05 total</b> | 1 | 0  | 1 |                |                |                               |        |        |            |
| R20              |   |    |   | Lepidoptera    | Tortricidae    | <i>Eudemis profundana</i>     | 97.0%  | 100.0% | HM872708.1 |
| R20              |   |    |   | Lepidoptera    | Noctuidae      | <i>Orthosia cruda</i>         | 96.0%  | 100.0% | KX047411.1 |
| <b>R20 total</b> | 2 | 1  | 0 |                |                |                               |        |        |            |
| R22              |   |    |   | Lepidoptera    | Noctuidae      | <i>Orthosia gothica</i>       | 96.0%  | 100.0% | GU707458.1 |
| R22              |   |    |   | Lepidoptera    | Tortricidae    | <i>Archips xylosteana</i>     | 100.0% | 100.0% | JF703030.1 |
| <b>R22 total</b> | 2 | 0  | 0 |                |                |                               |        |        |            |
| R24              |   |    |   | Hymenoptera    | Tenthredinidae | <i>Periclista albida</i>      | 100.0% | 99.3%  | KC975764.1 |
| R24              |   |    |   | Lepidoptera    | Pyalidae       | <i>Acrobasis consociella</i>  | 100.0% | 99.8%  | KX041029.1 |

|           |   |   |   |         |               |                              |        |        |            |
|-----------|---|---|---|---------|---------------|------------------------------|--------|--------|------------|
| R24 total | 2 | 0 | 0 |         |               |                              |        |        |            |
| S13       |   |   |   | Araneae | Araneidae     | <i>Araneus sturmi</i>        | 100.0% | 99.8%  | KY269282.1 |
| S13       |   |   |   | Araneae | Theridiidae   | <i>Phylloneta impressa</i>   | 97.0%  | 98.4%  | KY270202.1 |
| S13 total | 1 | 1 | 0 |         |               |                              |        |        |            |
| S15       |   |   |   | Araneae | Theridiidae   | <i>Phylloneta impressa</i>   | 87.0%  | 99.0%  | KY270379.1 |
| S15 total | 0 | 3 | 0 |         |               |                              |        |        |            |
| S18       |   |   |   | Araneae | Dictynidae    | <i>Lathys humilis</i>        | 98.0%  | 100.0% | MH630590.1 |
| S18       |   |   |   | Araneae | Philodromidae | <i>Philodromus praedatus</i> | 100.0% | 100.0% | MH630882.1 |
| S18 total | 0 | 3 | 0 |         |               |                              |        |        |            |

**Table S7** Diet composition of Blue and Great Tit nestlings with Lepidoptera components in breeding season 2019 (Primer ANML). Summary of MOTUs in faecal samples determined to lowest level possible with regard to the prevalence (Prev) and frequency of occurrence (% FO) for each study site and tit species (n = number of faecal samples with at least one detected MOTU)

| Family           | Species                       | % FO             |                  |                    |                     |                   |                    |                     |                   |
|------------------|-------------------------------|------------------|------------------|--------------------|---------------------|-------------------|--------------------|---------------------|-------------------|
|                  |                               | Prev             | Blue Tit         |                    |                     |                   |                    |                     | Great Tit         |
|                  |                               | all<br>(n = 113) | all<br>(n = 113) | forest<br>(n = 17) | orchard<br>(n = 19) | urban<br>(n = 20) | forest<br>(n = 19) | orchard<br>(n = 20) | urban<br>(n = 18) |
| Chimabachidae    | <i>Diurnea lipsiella</i>      | 3                | 2.7              | 17.6               |                     |                   |                    |                     |                   |
| Crambidae        | <i>Crambus lathoniellus</i>   | 1                | 0.9              |                    | 5.3                 |                   |                    |                     |                   |
| Drepanidae       | <i>Achlya flavicornis</i>     | 10               | 8.8              | 23.5               | 5.3                 |                   | 10.5               | 15.0                |                   |
| Drepanidae       | <i>Cymatophorina diluta</i>   | 5                | 4.4              | 17.6               |                     |                   | 5.3                | 5.0                 |                   |
| Drepanidae total |                               | 12               | 10.6             | 29.4               | 5.3                 |                   | 15.8               | 15.0                |                   |
| Erebidae         | <i>Catocala</i> sp.           | 8                | 7.1              |                    |                     |                   | 36.8               | 5.0                 |                   |
| Erebidae         | <i>Catocala sponsa</i>        | 10               | 8.8              | 47.1               | 5.3                 | 5.0               |                    |                     |                   |
| Erebidae         | <i>Lymantria dispar</i>       | 21               | 18.6             | 17.6               | 21.1                | 5.0               | 26.3               | 15.0                | 27.8              |
| Erebidae total   |                               | 36               | 31.9             | 58.8               | 21.1                | 10.0              | 57.9               | 20.0                | 27.8              |
| Geometridae      | <i>Agriopis aurantiaria</i>   | 29               | 25.7             | 58.8               | 36.8                | 10.0              | 21.1               | 20.0                | 11.1              |
| Geometridae      | <i>Agriopis leucophaearia</i> | 31               | 27.4             | 41.2               | 26.3                | 35.0              | 10.5               | 30.0                | 22.2              |
| Geometridae      | <i>Agriopis marginaria</i>    | 38               | 33.6             | 58.8               | 47.4                | 60.0              | 5.3                | 20.0                | 11.1              |



|                          |                              |           |             |             |             |             |             |             |             |
|--------------------------|------------------------------|-----------|-------------|-------------|-------------|-------------|-------------|-------------|-------------|
| <b>Geometridae</b>       | <i>Alsophila aescularia</i>  | 3         | 2.7         |             |             | 15.0        |             |             |             |
| <b>Geometridae</b>       | <i>Apocheima hispidaria</i>  | 12        | 10.6        | 23.5        | 5.3         | 10.0        | 5.3         | 5.0         | 16.7        |
| <b>Geometridae</b>       | <i>Colotois pennaria</i>     | 31        | 27.4        | 29.4        | 10.5        | 25.0        | 52.6        | 30.0        | 16.7        |
| <b>Geometridae</b>       | <i>Ennomos quercinaria</i>   | 2         | 1.8         | 11.8        |             |             |             |             |             |
| <b>Geometridae</b>       | <i>Epirrita christyi</i>     | 8         | 7.1         | 5.9         |             | 15.0        | 15.8        | 5.0         |             |
| <b>Geometridae</b>       | <i>Erannis defoliaria</i>    | 29        | 25.7        | 41.2        | 42.1        | 15.0        | 26.3        | 20.0        | 11.1        |
| <b>Geometridae</b>       | <i>Operophtera brumata</i>   | 15        | 13.3        |             | 21.1        | 30.0        |             | 15.0        | 11.1        |
| <b>Geometridae</b>       | <i>Operophtera fagata</i>    | 20        | 17.7        | 17.6        | 26.3        | 25.0        | 5.3         | 15.0        | 16.7        |
| <b>Geometridae</b>       | <i>Phigalia pilosaria</i>    | 27        | 23.9        | 11.8        | 15.8        | 40.0        | 5.3         | 40.0        | 27.8        |
| <b>Geometridae</b>       | <i>Theria primaria</i>       | 10        | 8.8         |             | 10.5        | 20.0        |             | 15.0        | 5.6         |
| <b>Geometridae total</b> |                              | <b>93</b> | <b>82.3</b> | <b>94.1</b> | <b>89.5</b> | <b>85.0</b> | <b>78.9</b> | <b>80.0</b> | <b>66.7</b> |
| <b>Lasiocampidae</b>     | <i>Malacosoma neustria</i>   | 97        | 85.8        | 58.8        | 78.9        | 90.0        | 94.7        | 90.0        | 100.0       |
| <b>Lycaenidae</b>        | <i>Favonius quercus</i>      | 14        | 12.4        | 23.5        | 5.3         | 25.0        | 5.3         | 10.0        | 5.6         |
| <b>Noctuidae</b>         | <i>Allophyes oxyacanthae</i> | 17        | 15.0        | 11.8        | 5.3         | 10.0        | 10.5        | 35.0        | 16.7        |
| <b>Noctuidae</b>         | <i>Amphipyra berbera</i>     | 8         | 7.1         |             |             | 20.0        | 5.3         | 5.0         | 11.1        |
| <b>Noctuidae</b>         | <i>Amphipyra pyramidea</i>   | 33        | 29.2        | 35.3        | 15.8        | 35.0        | 31.6        | 45.0        | 11.1        |
| <b>Noctuidae</b>         | <i>Asteroscopus sphinx</i>   | 22        | 19.5        | 47.1        | 5.3         | 15.0        | 26.3        | 25.0        |             |
| <b>Noctuidae</b>         | <i>Conistra rubiginosa</i>   | 3         | 2.7         |             |             |             |             | 15.0        |             |
| <b>Noctuidae</b>         | <i>Cosmia trapezina</i>      | 20        | 17.7        | 17.6        | 5.3         | 40.0        | 15.8        | 20.0        | 5.6         |
| <b>Noctuidae</b>         | <i>Gripesia aprilina</i>     | 15        | 13.3        | 11.8        | 15.8        | 25.0        | 5.3         | 20.0        |             |
| <b>Noctuidae</b>         | <i>Noctua fimbriata</i>      | 5         | 4.4         |             |             |             |             | 10.0        | 16.7        |

|                               |                                  |           |             |             |             |             |             |             |             |
|-------------------------------|----------------------------------|-----------|-------------|-------------|-------------|-------------|-------------|-------------|-------------|
| <b>Noctuidae</b>              | <i>Noctua janthe</i>             | 5         | 4.4         |             |             | 5.0         |             | 10.0        | 11.1        |
| <b>Noctuidae</b>              | <i>Orthosia</i> sp.              | 0         | 0.0         |             |             |             |             |             |             |
| <b>Noctuidae</b>              | <i>Panolis flammea</i>           | 3         | 2.7         |             | 10.5        |             | 5.3         |             |             |
| <b>Noctuidae<br/>total</b>    |                                  | <b>73</b> | <b>64.6</b> | <b>76.5</b> | <b>52.6</b> | <b>85.0</b> | <b>57.9</b> | <b>80.0</b> | <b>33.3</b> |
| <b>Notodontidae</b>           | <i>Drymonia ruficornis</i>       | 5         | 4.4         | 5.9         |             | 10.0        | 10.5        |             |             |
| <b>Notodontidae</b>           | <i>Ptilophora plumigera</i>      | 2         | 1.8         | 5.9         |             |             |             | 5.0         |             |
| <b>Notodontidae</b>           | <i>Thaumetopoea processionea</i> | 13        | 11.5        | 5.9         | 5.3         | 15.0        | 10.5        | 15.0        | 16.7        |
| <b>Notodontidae<br/>total</b> |                                  | <b>19</b> | <b>16.8</b> | <b>17.6</b> | <b>5.3</b>  | <b>25.0</b> | <b>21.1</b> | <b>15.0</b> | <b>16.7</b> |
| <b>Pyralidae</b>              | <i>Acrobasis advenella</i>       | 6         | 5.3         | 5.9         | 15.8        | 10.0        |             |             |             |
| <b>Pyralidae</b>              | <i>Phycita roborella</i>         | 13        | 11.5        | 29.4        | 10.5        | 20.0        | 5.3         | 5.0         |             |
| <b>Pyralidae<br/>total</b>    |                                  | <b>18</b> | <b>15.9</b> | <b>35.3</b> | <b>21.1</b> | <b>30.0</b> | <b>5.3</b>  | <b>5.0</b>  |             |
| <b>Tortricidae</b>            | <i>Acleris rhombana</i>          | 9         | 8.0         |             | 26.3        | 15.0        |             |             | 5.6         |
| <b>Tortricidae</b>            | <i>Archips crataegana</i>        | 12        | 10.6        | 11.8        | 5.3         | 20.0        | 10.5        | 10.0        | 5.6         |
| <b>Tortricidae</b>            | <i>Archips xylosteana</i>        | 61        | 54.0        | 64.7        | 52.6        | 50.0        | 63.2        | 45.0        | 50.0        |
| <b>Tortricidae</b>            | <i>Eudemis porphyrana</i>        | 8         | 7.1         |             | 5.3         |             | 10.5        | 15.0        | 11.1        |
| <b>Tortricidae</b>            | <i>Eudemis profundana</i>        | 5         | 4.4         |             | 5.3         | 20.0        |             |             |             |
| <b>Tortricidae</b>            | <i>Hedya nubiferana</i>          | 7         | 6.2         |             | 21.1        | 5.0         |             | 10.0        |             |
| <b>Tortricidae</b>            | <i>Hedya salicella</i>           | 1         | 0.9         |             | 5.3         |             |             |             |             |
| <b>Tortricidae</b>            | <i>Ptycholoma lecheana</i>       | 9         | 8.0         | 17.6        |             | 10.0        | 15.8        | 5.0         |             |

|                               |                                  |           |             |             |             |             |             |             |             |
|-------------------------------|----------------------------------|-----------|-------------|-------------|-------------|-------------|-------------|-------------|-------------|
| <b>Tortricidae</b>            | <i>Rhyacionia pinicolana</i>     | 2         | 1.8         |             | 10.5        |             |             |             |             |
| <b>Tortricidae</b>            | <i>Tortricodes alternella</i>    | 14        | 12.4        | 23.5        | 5.3         | 20.0        | 10.5        | 10.0        | 5.6         |
| <b>Tortricidae</b>            | <i>Tortrix viridana</i>          | 16        | 14.2        | 52.9        | 10.5        |             | 10.5        | 15.0        |             |
| <b>Tortricidae</b>            | <i>Zeiraphera isertana</i>       | 7         | 6.2         | 5.9         |             | 15.0        | 5.3         | 10.0        |             |
| <b>Tortricidae<br/>total</b>  |                                  | <b>84</b> | <b>74.3</b> | <b>88.2</b> | <b>94.7</b> | <b>70.0</b> | <b>78.9</b> | <b>60.0</b> | <b>55.6</b> |
| <b>Yponomeutidae</b>          | <i>Yponomeuta</i> sp.            | 1         | 0.9         |             |             | 5.0         |             |             |             |
| <b>Ypsolophidae</b>           | <i>Ypsolopha parenthesesella</i> | 19        | 16.8        |             | 5.3         | 15.0        | 10.5        | 30.0        | 38.9        |
| <b>Ypsolophidae</b>           | <i>Ypsolopha sequella</i>        | 7         | 6.2         |             | 10.5        | 10.0        | 5.3         | 5.0         | 5.6         |
| <b>Ypsolophidae</b>           | <i>Ypsolopha ustella</i>         | 8         | 7.1         | 11.8        |             | 15.0        |             | 10.0        | 5.6         |
| <b>Ypsolophidae<br/>total</b> |                                  | <b>30</b> | <b>26.5</b> | <b>11.8</b> | <b>15.8</b> | <b>35.0</b> | <b>15.8</b> | <b>35.0</b> | <b>44.4</b> |

**Table S8** Diet composition of Blue and Great Tit nestlings concerning other arthropods in breeding season 2019 apart from Lepidoptera (Primer ANML). Summary of MOTUs in faecal samples determined to lowest level possible with regard to the prevalence (Prev) and frequency of occurrence (% FO) for each study site and species (n=number of faecal samples with at least one detected MOTU)

|               |         |               |                             | % FO                |                     |                    |                     |                   |                    |                     |                   |
|---------------|---------|---------------|-----------------------------|---------------------|---------------------|--------------------|---------------------|-------------------|--------------------|---------------------|-------------------|
|               |         |               |                             | Prev                | Blue Tit            |                    |                     | Great Tit         |                    |                     |                   |
| Class         | Order   | Family        | Species                     | all<br>(n =<br>113) | all<br>(n =<br>113) | forest<br>(n = 17) | orchard<br>(n = 19) | urban<br>(n = 20) | forest<br>(n = 19) | orchard<br>(n = 20) | urban<br>(n = 18) |
| Arachnida     | Araneae | Anyphaenidae  | <i>Anyphaena accentuata</i> | 14                  | 12.4                | 11.8               | 5.3                 | 20.0              | 15.8               | 20.0                |                   |
|               |         | Araneidae     | <i>Gibbaranea gibbosa</i>   | 8                   | 7.1                 | 17.6               | 21.1                |                   | 5.3                |                     |                   |
|               |         | Clubionidae   | <i>Clubiona pallidula</i>   | 6                   | 5.3                 |                    | 5.3                 | 10.0              |                    | 5.0                 | 11.1              |
|               |         | Philodromidae | <i>Philodromus albidus</i>  | 8                   | 7.1                 | 23.5               | 10.5                | 5.0               |                    | 5.0                 |                   |
|               |         | Philodromidae | <i>Philodromus aureolus</i> | 20                  | 17.7                | 41.2               | 10.5                | 40.0              | 5.3                |                     | 11.1              |
|               |         | Philodromidae | <i>Philodromus buxi</i>     | 1                   | 0.9                 |                    |                     | 5.0               |                    |                     |                   |
|               |         | Philodromidae | <i>Philodromus collinus</i> | 8                   | 7.1                 | 11.8               | 5.3                 | 20.0              |                    |                     | 5.6               |
|               |         | Philodromidae | <i>Philodromus rufus</i>    | 3                   | 2.7                 |                    |                     | 10.0              |                    | 5.0                 |                   |
|               |         | Theridiidae   | <i>Anelosimus vittatus</i>  | 7                   | 6.2                 |                    | 10.5                | 10.0              | 5.3                | 5.0                 | 5.6               |
|               |         | Thomisidae    | <i>Pistius truncatus</i>    | 9                   | 8.0                 | 29.4               | 5.3                 | 5.0               |                    | 5.0                 | 5.6               |
|               |         | Thomisidae    | <i>Xysticus cristatus</i>   | 3                   | 2.7                 | 11.8               | 5.3                 |                   |                    |                     |                   |
|               |         | Thomisidae    | <i>Xysticus kochi</i>       | 5                   | 4.4                 |                    | 15.8                | 5.0               |                    | 5.0                 |                   |
|               |         | Thomisidae    | <i>Xysticus lanio</i>       | 21                  | 18.6                | 47.1               | 15.8                | 10.0              | 26.3               | 10.0                | 5.6               |
| Araneae total |         |               |                             | 58                  | 51.3                | 70.6               | 52.6                | 75.0              | 42.1               | 35.0                | 33.3              |



|                  |             |                                     |                         |      |      |      |      |      |      |      |     |
|------------------|-------------|-------------------------------------|-------------------------|------|------|------|------|------|------|------|-----|
| Insecta          | Coleoptera  | Buprestidae                         | <i>Anthaxia candens</i> | 3    | 2.7  |      | 5.0  | 5.0  | 5.6  |      |     |
|                  |             | Curculionidae                       | <i>Phyllobius pyri</i>  | 5    | 4.4  | 10.5 | 15.0 |      |      |      |     |
|                  |             | Elateridae                          | <i>Agrypnus murinus</i> | 1    | 0.9  |      |      |      | 5.6  |      |     |
|                  |             | Tenebrionidae                       | <i>Lagria atripes</i>   | 2    | 1.8  | 11.8 |      |      |      |      |     |
| Coleoptera total |             |                                     |                         | 10   | 8.8  | 11.8 | 10.5 | 20.0 | 5.0  | 5.6  |     |
| Diptera          | Asilidae    | <i>Lamyra marginata</i>             | 1                       | 0.9  |      |      |      | 5.3  |      |      |     |
|                  | Muscidae    | <i>Helina impuncta</i>              | 3                       | 2.7  | 11.8 |      | 5.0  |      |      |      |     |
|                  | Phoridae    | indet.                              | 1                       | 0.9  |      |      |      |      | 5.0  |      |     |
|                  | Psychodidae | indet.                              | 1                       | 0.9  |      |      |      |      | 5.0  |      |     |
|                  | Syrphidae   | <i>Eupeodes</i> sp.                 | 1                       | 0.9  |      |      |      |      |      | 5.6  |     |
|                  | Syrphidae   | <i>Scaeva selenitica</i>            | 2                       | 1.8  | 11.8 |      |      |      |      |      |     |
|                  | Syrphidae   | <i>Syrphus torvus</i>               | 3                       | 2.7  |      | 5.3  | 5.0  | 5.3  |      |      |     |
|                  | Tachinidae  | <i>Lypha dubia</i>                  | 22                      | 19.5 | 35.3 | 47.4 | 15.0 | 15.8 | 5.0  |      |     |
|                  | Tachinidae  | <i>Panzeria rudis</i>               | 4                       | 3.5  | 11.8 | 5.3  |      |      | 5.0  |      |     |
|                  | Tachinidae  | <i>Phorocera obscura</i>            | 3                       | 2.7  | 5.9  |      | 5.0  | 5.3  |      |      |     |
|                  | Tachinidae  | <i>Phryno vetula</i>                | 4                       | 3.5  | 11.8 |      | 5.0  |      | 5.0  |      |     |
| Diptera total    |             |                                     |                         | 36   | 31.9 | 58.8 | 47.4 | 30.0 | 31.6 | 20.0 | 5.6 |
| Hemiptera        | Aphididae   | <i>Microlophium carnosum</i>        | 6                       | 5.3  |      | 10.5 | 10.0 |      | 5.0  | 5.6  |     |
|                  | Aphididae   | <i>Phorodon humuli</i>              | 19                      | 16.8 | 17.6 | 15.8 | 20.0 | 10.5 | 25.0 | 11.1 |     |
|                  | Miridae     | <i>Closterotomus fulvomaculatus</i> | 2                       | 1.8  |      |      | 5.0  |      |      | 5.6  |     |

|                    |                |                                |           |             |             |             |             |             |             |
|--------------------|----------------|--------------------------------|-----------|-------------|-------------|-------------|-------------|-------------|-------------|
|                    | Miridae        | <i>Rhabdomiris striatellus</i> | 9         | 8.0         | 17.6        | 5.3         | 15.0        | 10.0        |             |
|                    | Pentatomidae   | <i>Podops inunctus</i>         | 1         | 0.9         |             |             | 5.0         |             |             |
| <b>Hemiptera</b>   |                |                                | <b>34</b> | <b>30.1</b> | <b>35.3</b> | <b>31.6</b> | <b>45.0</b> | <b>10.5</b> | <b>35.0</b> |
| <b>total</b>       |                |                                |           |             |             |             |             |             | <b>22.2</b> |
|                    |                |                                |           |             |             |             |             |             |             |
| <b>Hymenoptera</b> | Apidae         | <i>Apis mellifera</i>          | 4         | 3.5         | 5.9         |             |             | 10.0        | 5.6         |
|                    | Braconidae     | indet.                         | 46        | 40.7        | 11.8        | 47.4        | 45.0        | 36.8        | 40.0        |
|                    | Ichneumonidae  | indet.                         | 1         | 0.9         |             | 5.3         |             |             |             |
|                    | Tenthredinidae | <i>Mesoneura opaca</i>         | 40        | 35.4        | 17.6        | 52.6        | 35.0        | 21.1        | 35.0        |
|                    | Tenthredinidae | <i>Periclista albida</i>       | 13        | 11.5        | 5.9         | 5.3         | 15.0        |             | 20.0        |
| <b>Hymenoptera</b> |                |                                | <b>62</b> | <b>54.9</b> | <b>23.5</b> | <b>68.4</b> | <b>55.0</b> | <b>47.4</b> | <b>60.0</b> |
| <b>total</b>       |                |                                |           |             |             |             |             |             | <b>72.2</b> |
|                    |                |                                |           |             |             |             |             |             |             |
| <b>Neuroptera</b>  | Hemerobiidae   | <i>Hemerobius micans</i>       | 1         | 0.9         |             |             |             |             | 5.6         |
| <b>Orthoptera</b>  | Acrididae      | <i>Chorthippus</i> sp.         | 5         | 4.4         | 5.9         |             | 15.0        |             | 5.6         |
|                    | Acrididae      | <i>Stenobothrus</i> sp.        | 3         | 2.7         | 5.9         |             |             |             | 11.1        |
| <b>Orthoptera</b>  |                |                                | <b>7</b>  | <b>6.2</b>  | <b>5.9</b>  | <b>5.3</b>  | <b>10.0</b> |             | <b>16.7</b> |
| <b>total</b>       |                |                                |           |             |             |             |             |             |             |

**Table S9** Comparison of arthropod prey biodiversity at species level in the diet of Blue and Great Tits among forest, orchard and urban sites

| Species   | Habitat | Species richness SR | Shannon index H' | Evenness E | <u>Jaccard similarity index CC<sub>J</sub></u> |         |       |
|-----------|---------|---------------------|------------------|------------|------------------------------------------------|---------|-------|
|           |         |                     |                  |            | forest                                         | orchard | urban |
| Blue Tit  | forest  | 57                  | 3.8              | 0.94       |                                                | 0.53    | 0.56  |
|           | orchard | 59                  | 3.7              | 0.91       |                                                |         | 0.62  |
|           | urban   | 66                  | 3.9              | 0.93       |                                                |         |       |
| Great Tit | forest  | 46                  | 3.4              | 0.90       |                                                | 0.57    | 0.43  |
|           | orchard | 61                  | 3.7              | 0.91       |                                                |         | 0.54  |
|           | urban   | 47                  | 3.3              | 0.85       |                                                |         |       |

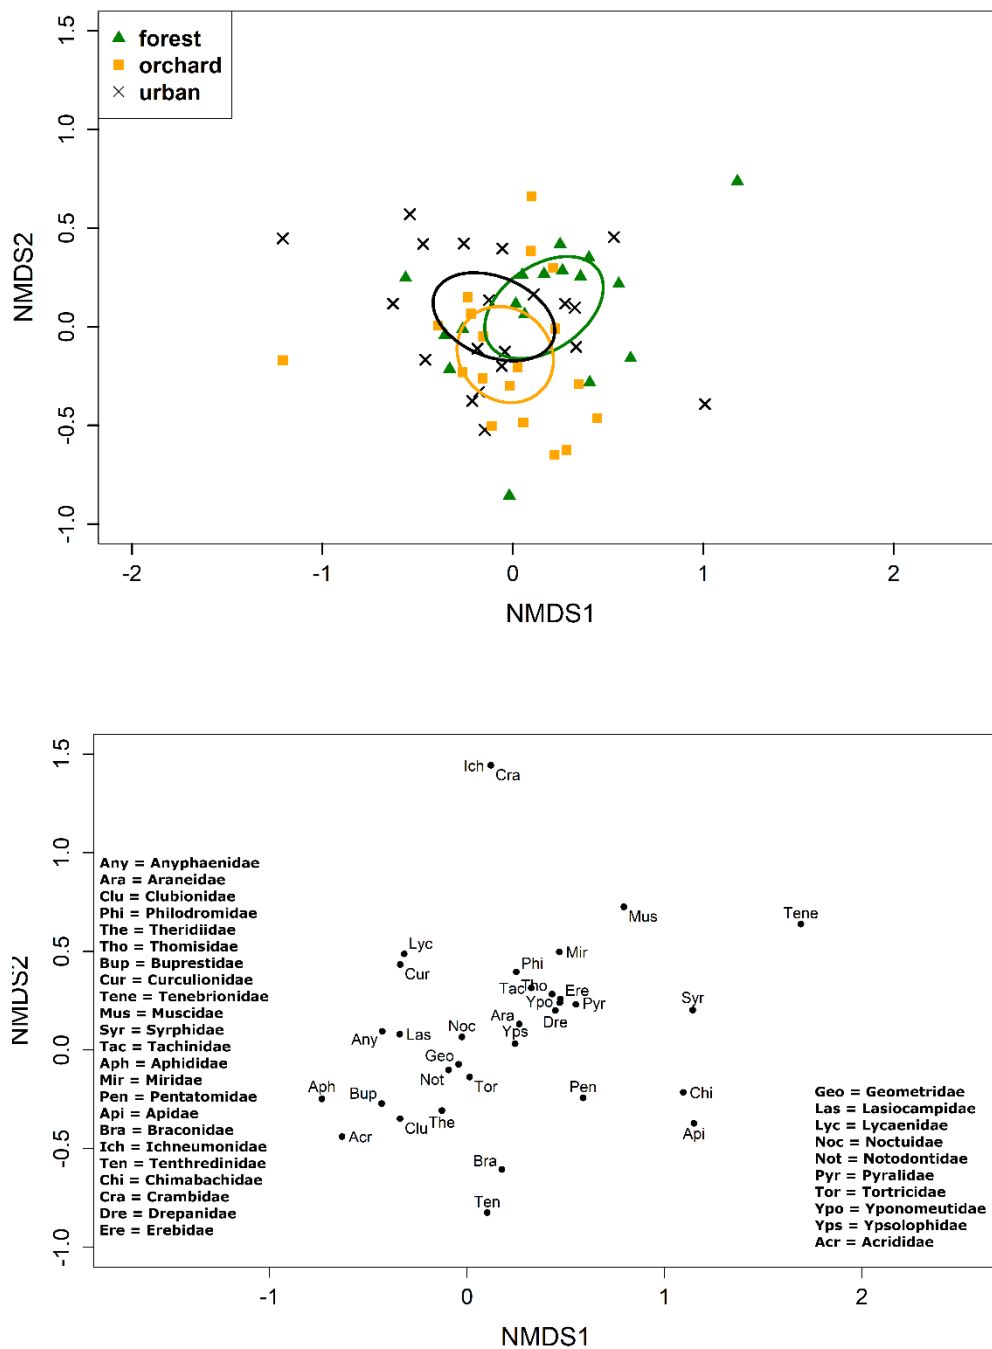

**Figure S3a** NMDS ordination (non-metric multidimensional scaling) of entire diet composition at the family level of Blue Tits among forest (green triangle), orchard (yellow square) and urban sites (black cross). Each point in the upper plot denotes a faecal sample of a tit nestling in its respective habitat and each point in the lower plot shows the ordination of detected arthropod families.

Statistics: NMDS stress = 0.20; permutation analysis:  $F = 2.86$ ,  $R^2 = 0.10$ ,  $p = 0.002$  (PERMANOVA)



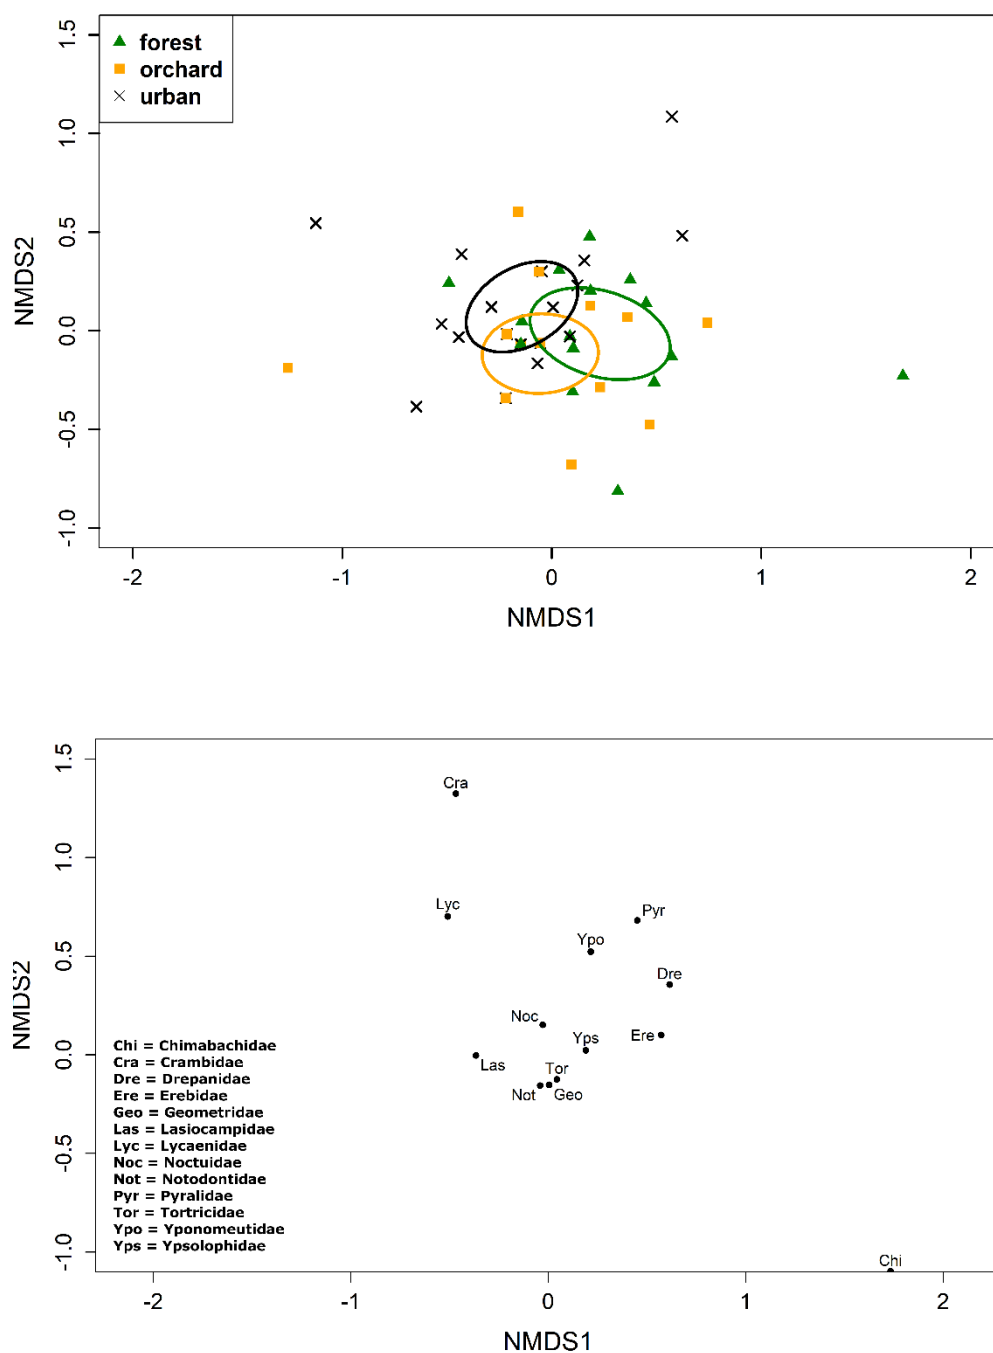

**Figure S3b** NMDS ordination (non-metric multidimensional scaling) of lepidopteran diet components at family level of Blue Tits among forest (green triangle), orchard (yellow square) and urban sites (black cross). Each point in the upper plot denotes a faecal sample of a tit nestling in its respective habitat and each point in the lower plot shows the ordination of detected arthropod families.

Statistics: NMDS stress = 0.16; permutation analysis:  $F = 4.36$ ,  $R^2 = 0.14$ ,  $p = 0.001$  (PERMANOVA)

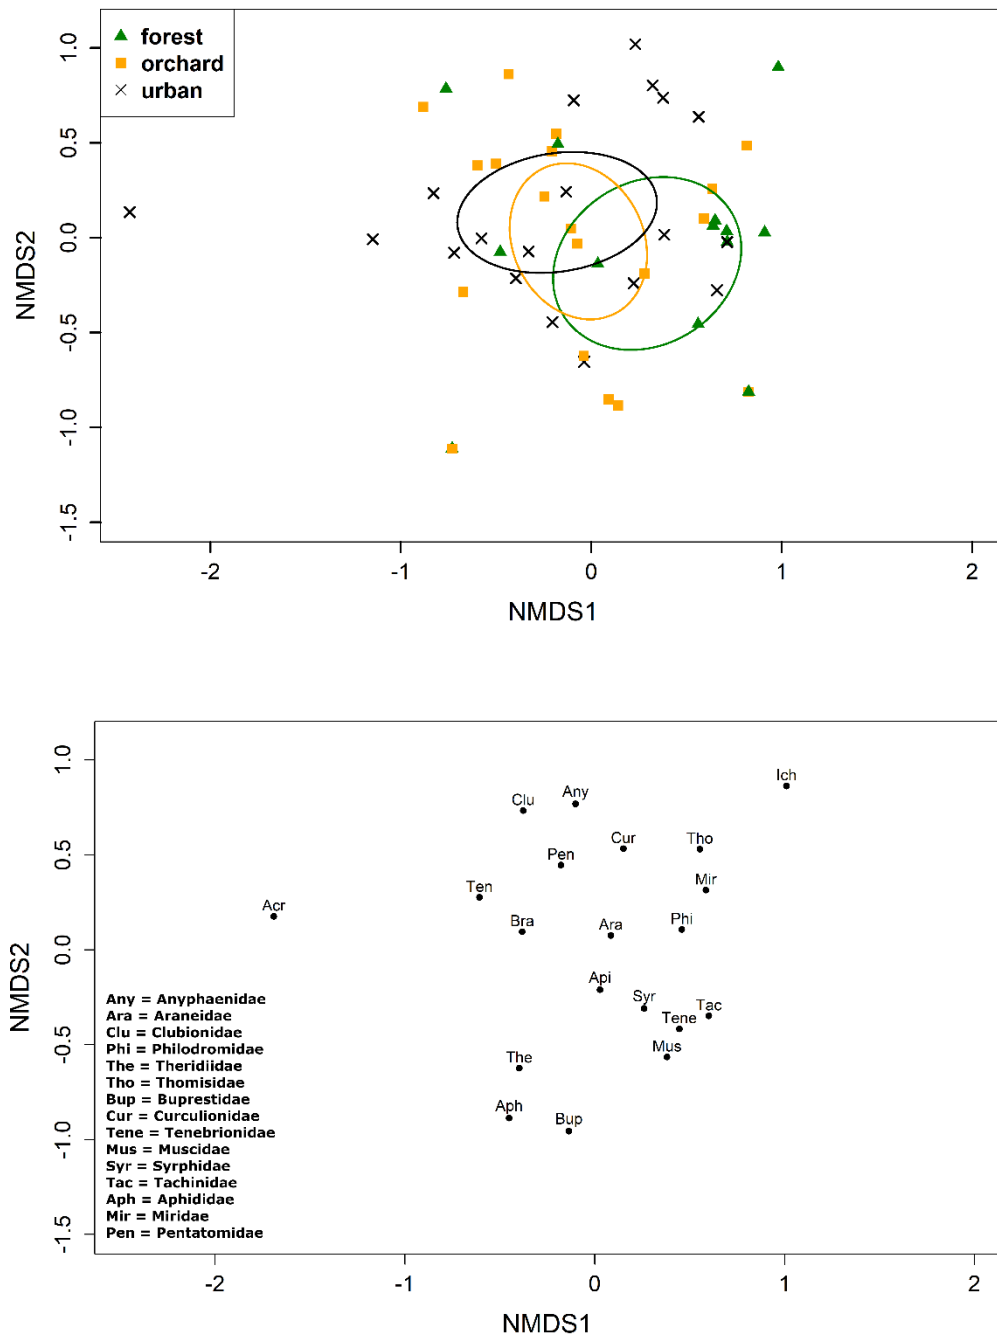

**Figure S3c** NMDS ordination (non-metric multidimensional scaling) of other arthropod diet components at the family level of Blue Tits among forest (green triangle), orchard (yellow square) and urban sites (black cross). Each point in the upper plot denotes a faecal sample of a tit nestling in its respective habitat and each point in the lower plot shows the ordination of detected arthropod families.

Statistics: NMDS stress = 0.14; permutation analysis:  $F = 2.33$ ,  $R^2 = 0.08$ ,  $p = 0.017$  (PERMANOVA)

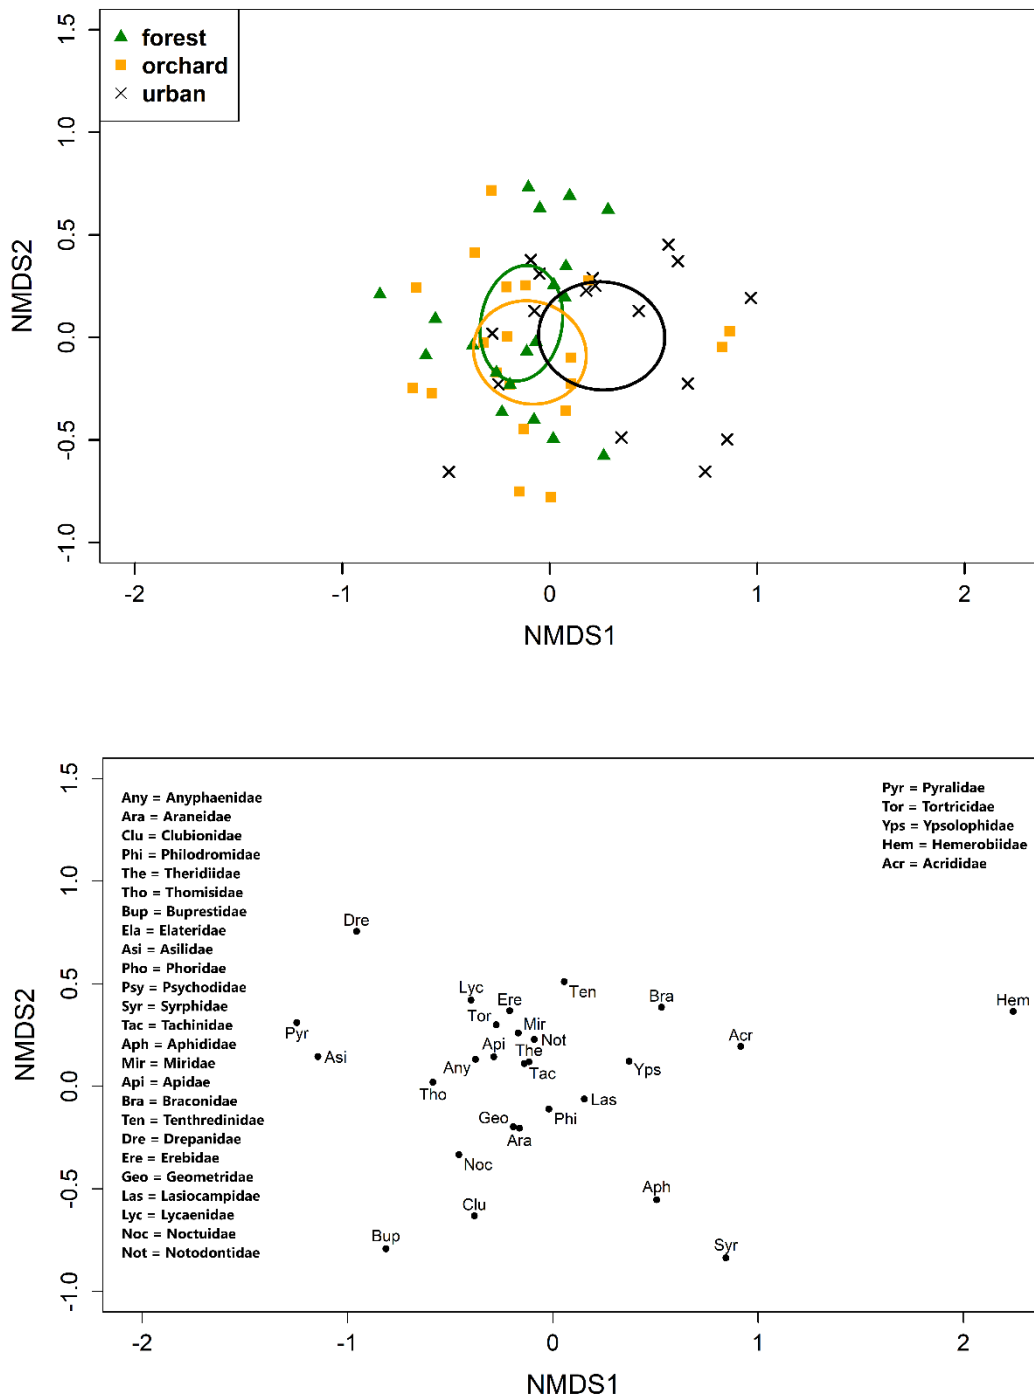

**Figure S4a** NMDS ordination (non-metric multidimensional scaling) of entire diet composition at the family level of Great Tits among forest (green triangle), orchard (yellow square) and urban sites (black cross). Each point in the upper plot denotes a faecal sample of a tit nestling in its respective habitat and each point in the lower plot shows the ordination of detected arthropod families.

Statistics: NMDS stress = 0.22; permutation analysis:  $F = 2.20$ ,  $R^2 = 0.08$ ,  $p = 0.025$  (PERMANOVA)

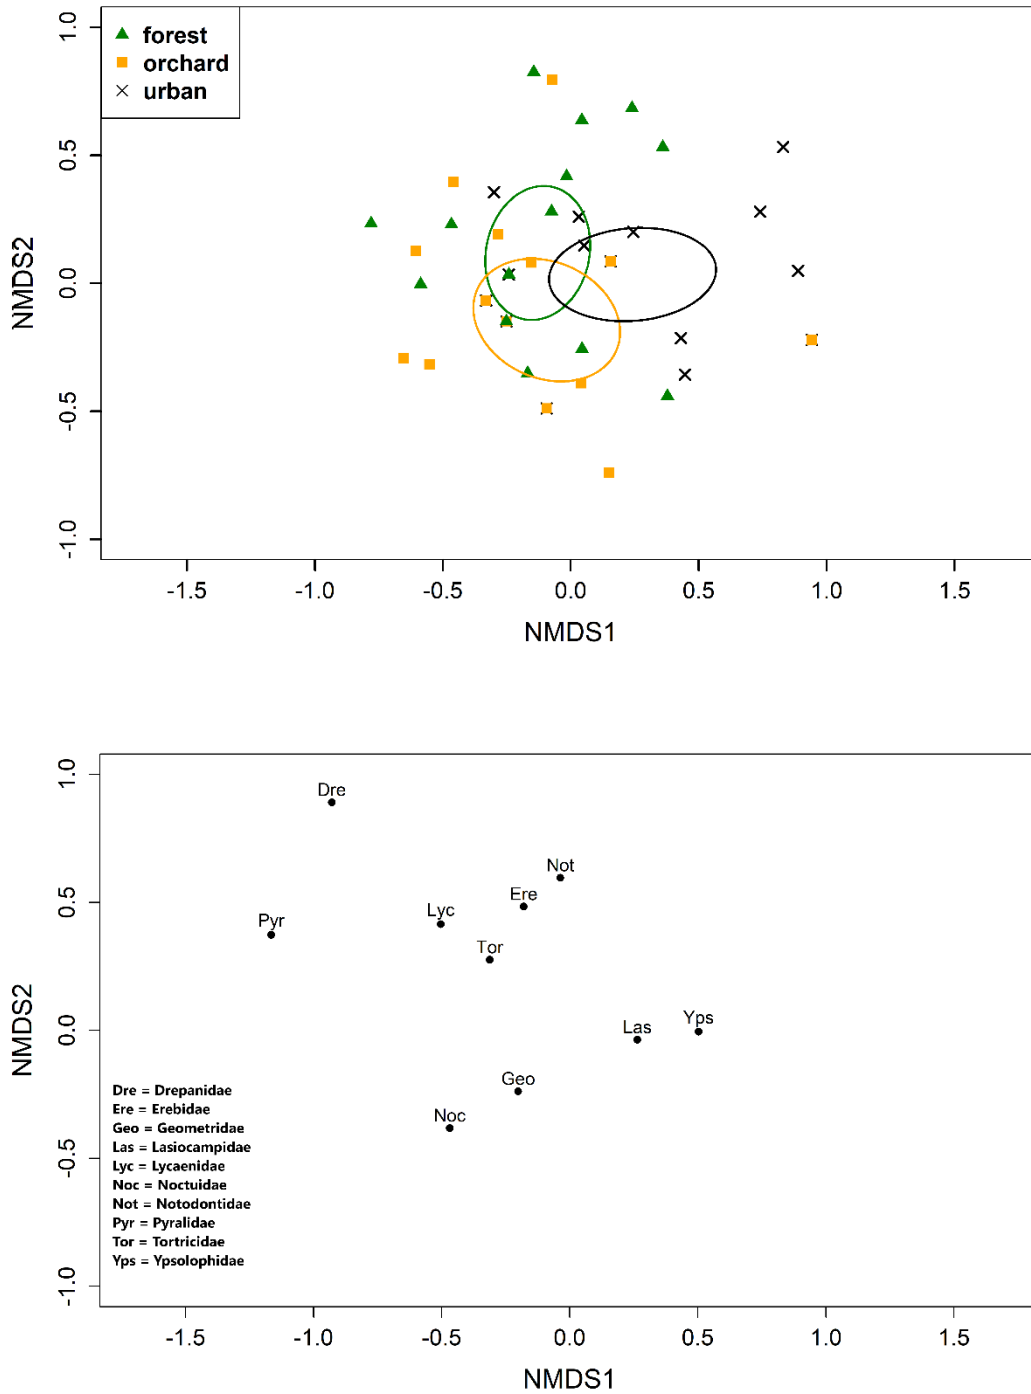

**Figure S4b** NMDS ordination (non-metric multidimensional scaling) of lepidopteran diet components at the family level of Great Tits among forest (green triangle), orchard (yellow square) and urban sites (black cross). Each point in the upper plot denotes a faecal sample of a tit nestling in its respective habitat and each point in the lower plot shows the ordination of detected arthropod families.

Statistics: NMDS stress = 0.18; permutation analysis:  $F = 3.01$ ,  $R^2 = 0.10$ ,  $p = 0.020$  (PERMANOVA)



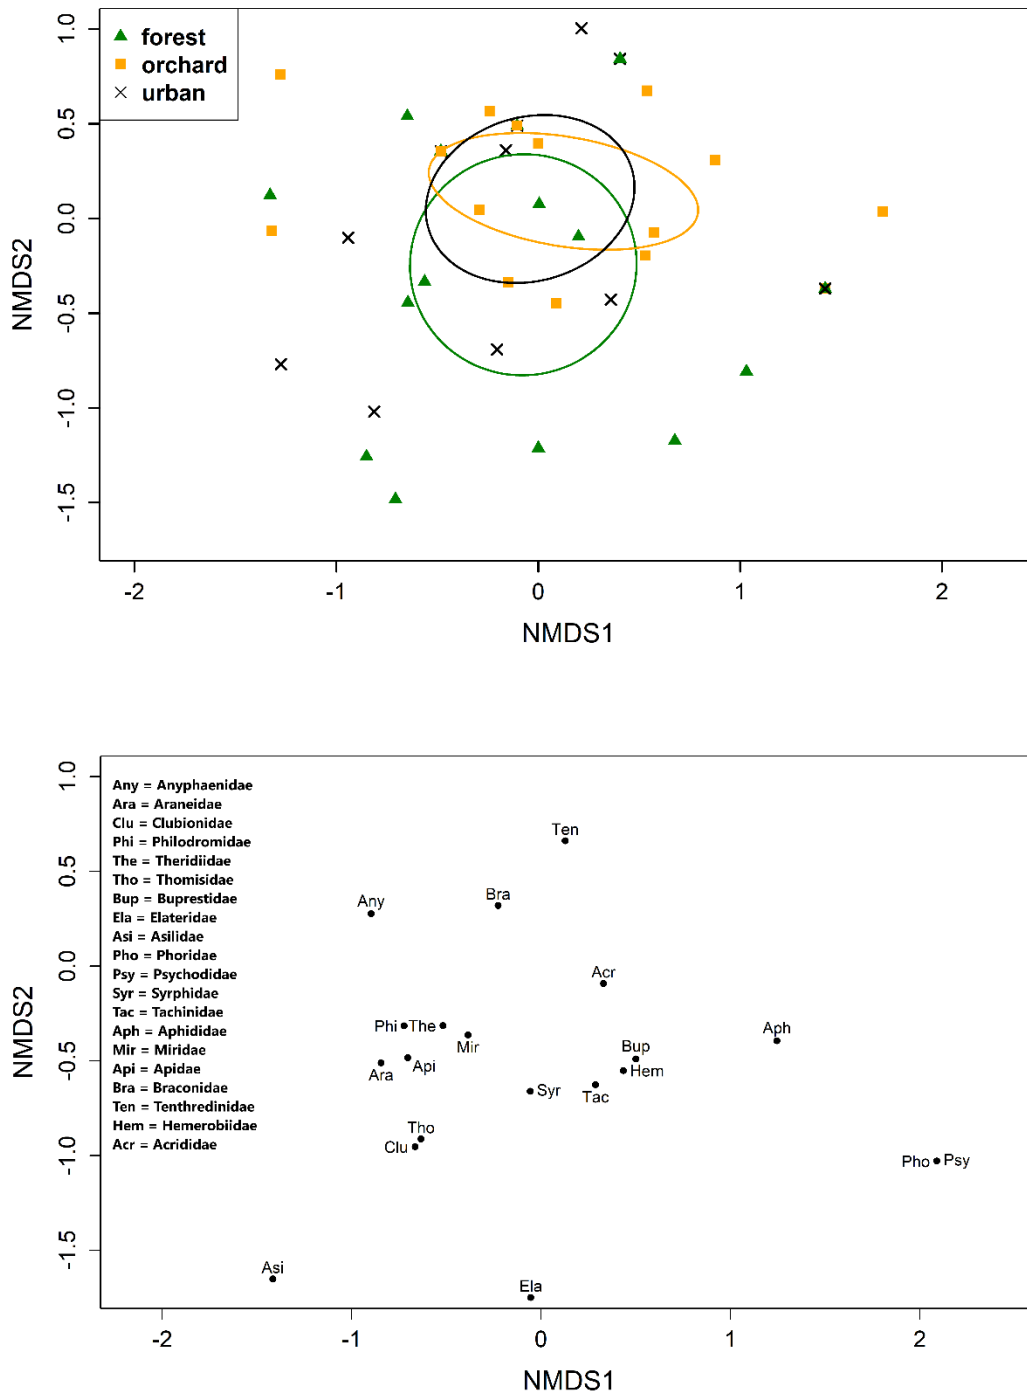

**Figure S4c** NMDS ordination (non-metric multidimensional scaling) of other arthropod diet components at the family level of Great Tits among forest (green triangle), orchard (yellow square) and urban sites (black cross). Each point in the upper plot denotes a faecal sample of a tit nestling in its respective habitat and each point in the lower plot shows the ordination of detected arthropod families.

Statistics: NMDS stress = 0.11; permutation analysis:  $F = 1.34$ ,  $R^2 = 0.06$ ,  $p = 0.235$  (PERMANOVA)

**Table S10** Comparison of biodiversity of prey components at family (a) and species level (b) between Blue and Great Tit nestlings in forest, orchard and urban sites

|                     |                      | <u>Jaccard similarity index <math>CC_j</math></u> |         |       |
|---------------------|----------------------|---------------------------------------------------|---------|-------|
|                     |                      | forest                                            | orchard | urban |
| a) at family level  | Lepidoptera          | 0.91                                              | 0.91    | 0.80  |
|                     | remaining arthropods | 0.56                                              | 0.56    | 0.63  |
| b) at species level | Lepidoptera          | 0.70                                              | 0.60    | 0.63  |
|                     | remaining arthropods | 0.35                                              | 0.54    | 0.44  |

**(A) Diet composition: all taxa**

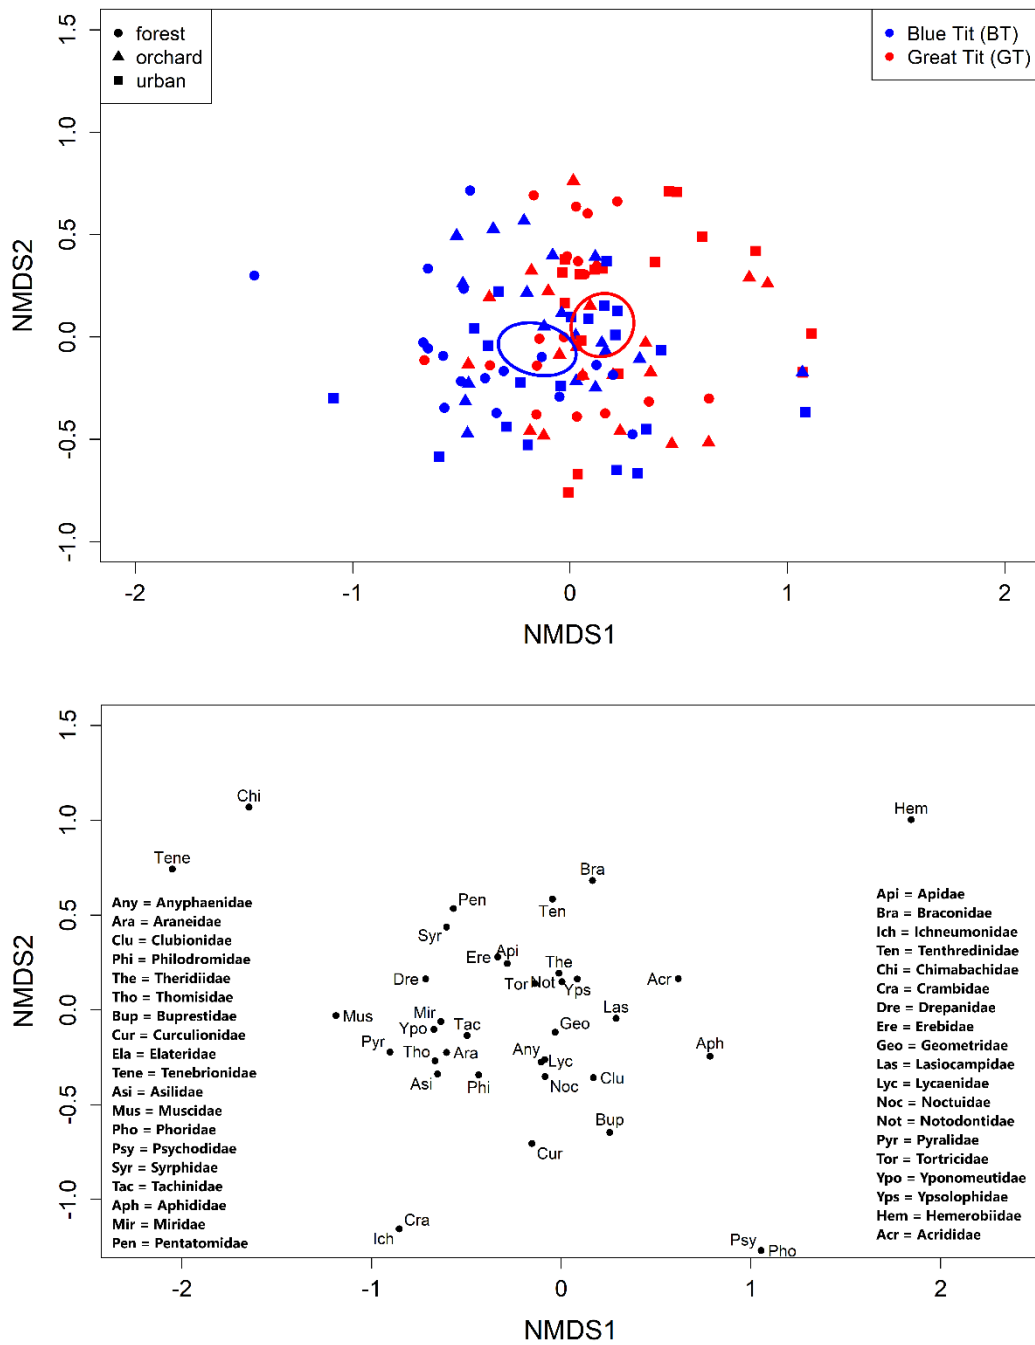

**Figure 5a** NMDS ordination of inter-specific differences in the entire diet compositions of Blue Tits (blue) and Great Tits (red) at the family level. In the upper plot habitats are marked with different symbols (forest = triangles, orchards = squares, urban sites = crosses). Upper plot indicates faecal samples of a nestling in its respective habitat with spider diagrams and 99% confidence ellipses. Lower plot shows the ordination of detected arthropod families.

Statistics: NMDS stress = 0.23; permutation analysis:  $F = 6.06$ ,  $R^2 = 0.05$ ,  $p = 0.001$  (PERMANOVA)

(B) Diet composition: Lepidoptera

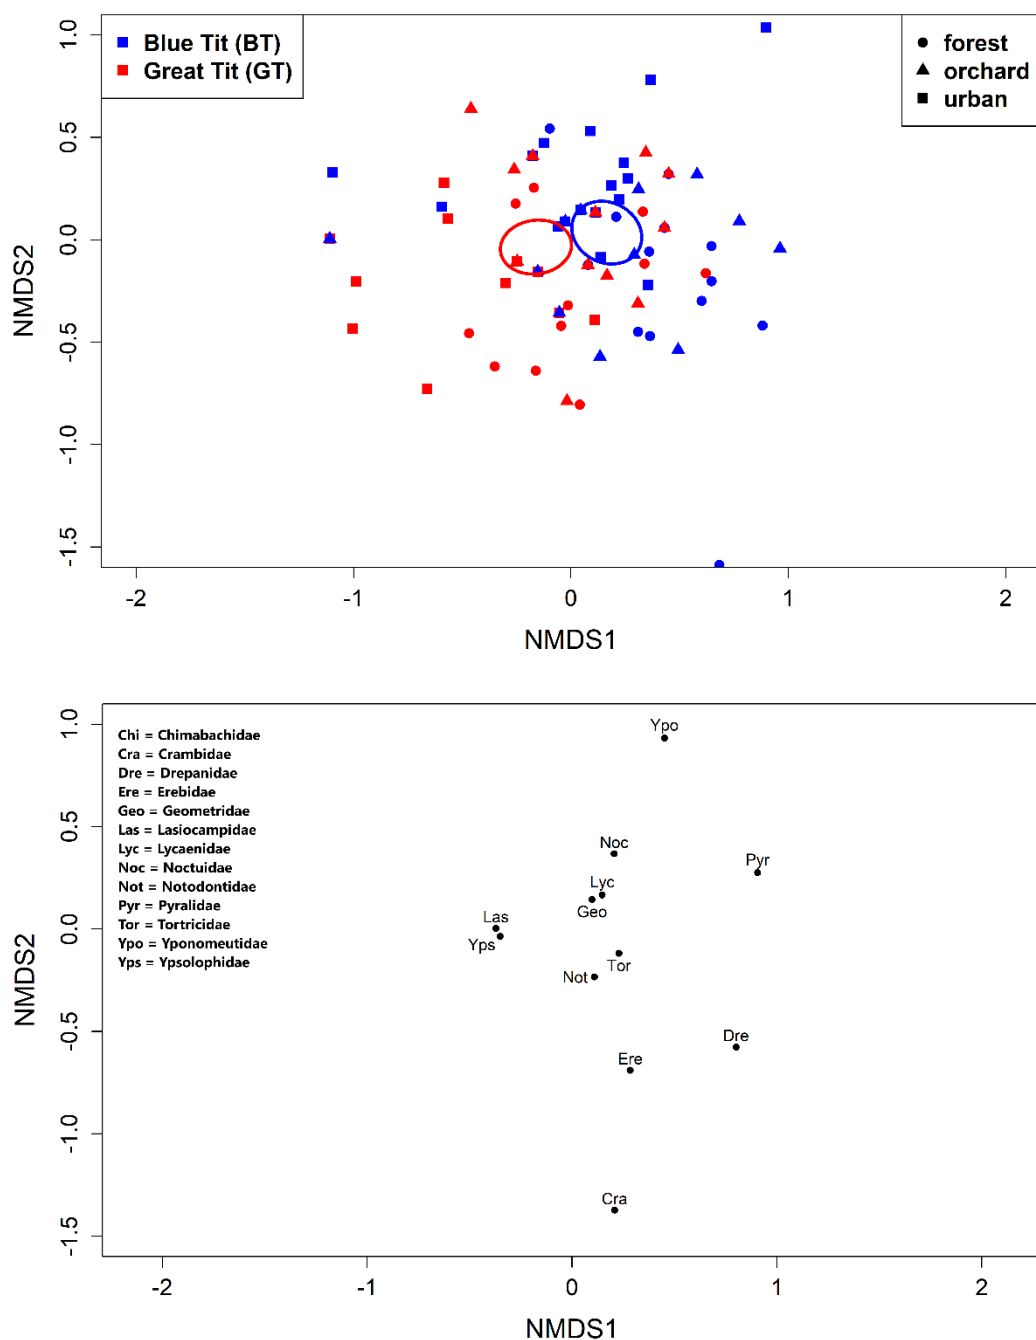

**Figure 5b** NMDS ordination of inter-specific differences in the lepidopteran diet components of Blue Tits (blue) and Great Tits (red) at the family level. In the upper plot habitats are marked with different symbols (forest = triangles, orchards = squares, urban sites = crosses). Upper plot indicates faecal samples of a nestling in its respective habitat with spider diagrams and 99% confidence ellipses. Lower plot shows the ordination of detected arthropod families.

Statistics: NMDS stress = 0.18; permutation analysis:  $F = 7.35$ ,  $R^2 = 0.06$ ,  $p = 0.001$  (PERMANOVA)

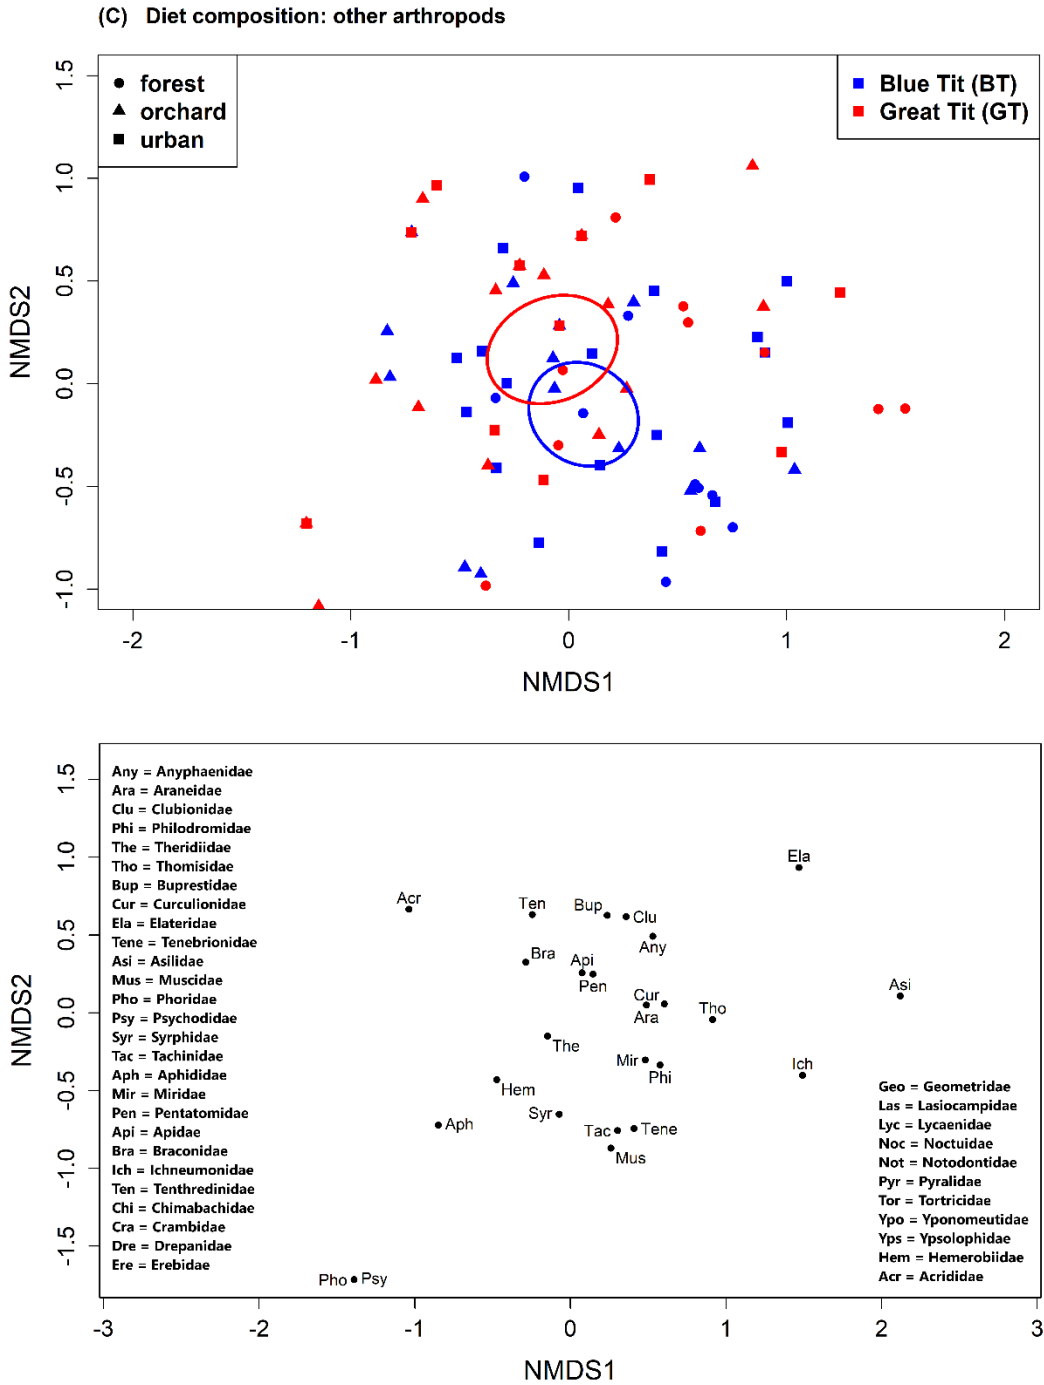

**Figure 5c** NMDS ordination of inter-specific differences in the other arthropod diet components of Blue Tits (blue) and Great Tits (red) at the family level. In the upper plot habitats are marked with different symbols (forest = triangles, orchards = squares, urban sites = crosses). Upper plot indicates faecal samples of a nestling in its respective habitat with spider diagrams and 99% confidence ellipses. Lower plot shows the ordination of detected arthropod families.

Statistics: NMDS stress = 0.13; permutation analysis:  $F = 4.95$ ,  $R^2 = 0.05$ ,  $p = 0.002$  (PERMANOVA)



**Table S11** Significant differences in the frequency of occurrence (% FO) of arthropod families in the nestling diet between Blue and Great Tits. ‘\*\*’ mark significance level (\* = below 0.05, \*\* = below 0.01)

| order       | family        | habitat | Blue Tit<br>% FO | Great Tit<br>% FO | Statistical test    | p-value (adj.) |
|-------------|---------------|---------|------------------|-------------------|---------------------|----------------|
| Araneae     | Araneidae     | orchard | 21.1             |                   | Fisher's exact test | 0.047 *        |
|             | Philodromidae | forest  | 47.1             | 5.3               | Fisher's exact test | 0.006 **       |
| Araneae     | Philodromidae | urban   | 55.0             | 16.7              | Fisher's exact test | 0.020 *        |
| Diptera     | Tachinidae    | forest  | 58.8             | 21.1              | Fisher's exact test | 0.039 *        |
|             | Tachinidae    | orchard | 47.4             | 15.0              | Fisher's exact test | 0.041 *        |
| Lepidoptera | Lasiocampidae | forest  | 58.8             | 94.7              | Fisher's exact test | 0.016 *        |
|             | Noctuidae     | urban   | 85.0             | 33.3              | Fisher's exact test | 0.002 **       |
|             | Pyalidae      | forest  | 35.3             | 5.3               | Fisher's exact test | 0.037 *        |
|             | Pyalidae      | urban   | 30.0             |                   | Fisher's exact test | 0.021 *        |
|             | Tortricidae   | orchard | 94.7             | 35.0              | Fisher's exact test | 0.020 *        |

**Table S12** Comparison of prey biodiversity at species level in the diet of Blue and Great Tit nestlings among forest, orchard and urban sites

|                     | Species   | Habitat | Shannon index<br>$H'$ | Evenness<br>$E$ | <u>Jaccard similarity index <math>CC_j</math></u> |       |
|---------------------|-----------|---------|-----------------------|-----------------|---------------------------------------------------|-------|
|                     |           |         |                       |                 | orchard                                           | urban |
| a) Lepidoptera      |           | forest  | 3.3                   | 0.93            | 0.54                                              | 0.62  |
|                     | Blue Tit  | orchard | 3.2                   | 0.90            |                                                   | 0.65  |
|                     |           | urban   | 3.4                   | 0.93            |                                                   |       |
|                     |           | forest  | 3.1                   | 0.88            | 0.80                                              | 0.56  |
|                     | Great Tit | orchard | 3.4                   | 0.92            |                                                   | 0.68  |
|                     |           | urban   | 3.0                   | 0.89            |                                                   |       |
| b) other arthropods |           | forest  | 2.9                   | 0.94            | 0.50                                              | 0.47  |
|                     | Blue Tit  | orchard | 2.7                   | 0.88            |                                                   | 0.58  |
|                     |           | urban   | 3.0                   | 0.92            |                                                   |       |
|                     |           | forest  | 2.2                   | 0.90            | 0.27                                              | 0.24  |
|                     | Great Tit | orchard | 2.7                   | 0.89            |                                                   | 0.38  |
|                     |           | urban   | 2.5                   | 0.84            |                                                   |       |

**Table S13** Output of Permutational Multivariate Analysis of Variance (PERMANOVA)

| <b>Species</b>      | <b>analysed prey group</b> | <b>parameters</b> | <b>df</b> | <b>Mean Squares</b> | <b>F Model</b> | <b>R<sup>2</sup></b> | <b>p-value</b> |
|---------------------|----------------------------|-------------------|-----------|---------------------|----------------|----------------------|----------------|
| <b>a) Blue Tit</b>  | total                      | <i>Habitat</i>    | 2         | 0.41                | 3.68           | 0.10                 | <b>0.001</b>   |
|                     |                            | <i>Nest</i>       | 29        | 0.17                | 1.53           | 0.59                 | <b>0.008</b>   |
|                     |                            | <i>Residuals</i>  | 24        | 0.11                |                | 0.32                 |                |
|                     | Lepidoptera                | <i>Habitat</i>    | 2         | 0.39                | 5.46           | 0.14                 | <b>0.001</b>   |
|                     |                            | <i>Nest</i>       | 29        | 0.10                | 1.46           | 0.55                 | 0.116          |
|                     |                            | <i>Residuals</i>  | 24        | 0.07                |                | 0.31                 |                |
|                     | other arthropods           | <i>Habitat</i>    | 2         | 0.67                | 3.10           | 0.08                 | <b>0.004</b>   |
|                     |                            | <i>Nest</i>       | 27        | 0.35                | 1.62           | 0.59                 | <b>0.001</b>   |
|                     |                            | <i>Residuals</i>  | 24        | 0.22                |                | 0.32                 |                |
| <b>b) Great Tit</b> | total                      | <i>Habitat</i>    | 2         | 0.31                | 2.70           | 0.08                 | <b>0.008</b>   |
|                     |                            | <i>Nest</i>       | 29        | 0.17                | 1.42           | 0.58                 | <b>0.035</b>   |
|                     |                            | <i>Residuals</i>  | 25        | 0.12                |                | 0.35                 |                |
|                     | Lepidoptera                | <i>Habitat</i>    | 2         | 0.28                | 3.40           | 0.10                 | <b>0.009</b>   |
|                     |                            | <i>Nest</i>       | 29        | 0.10                | 1.24           | 0.53                 | 0.222          |
|                     |                            | <i>Residuals</i>  | 25        | 0.08                |                | 0.37                 |                |
|                     | other arthropods           | <i>Habitat</i>    | 2         | 0.42                | 1.48           | 0.06                 | 0.162          |
|                     |                            | <i>Nest</i>       | 27        | 0.33                | 1.18           | 0.60                 | 0.211          |
|                     |                            | <i>Residuals</i>  | 18        | 0.28                |                | 0.34                 |                |

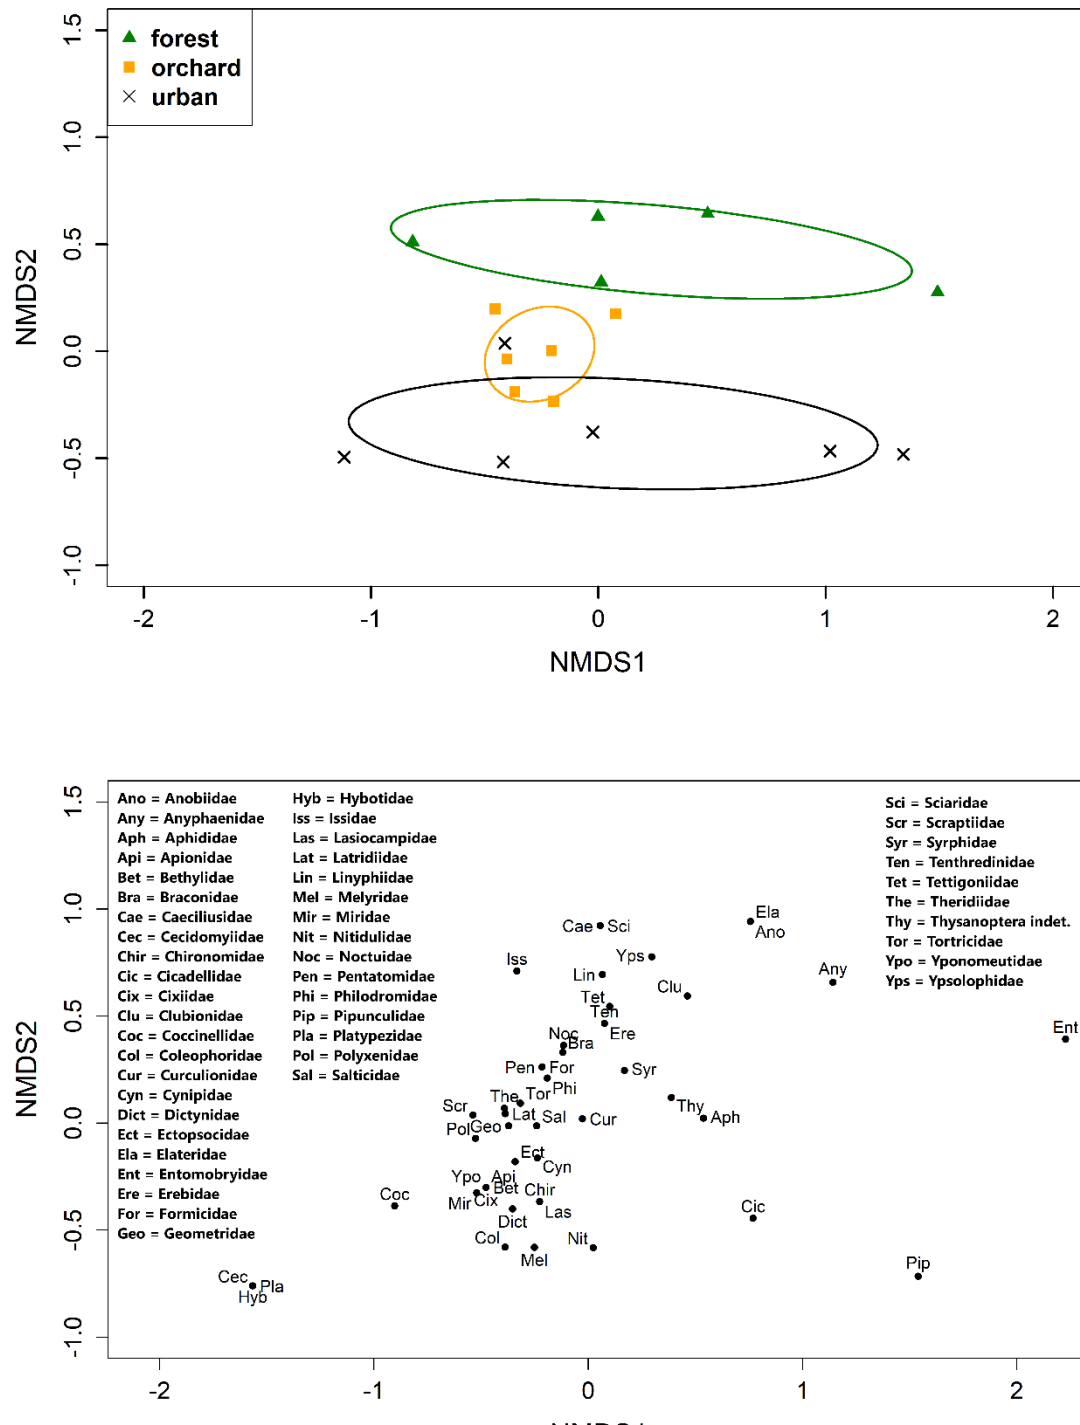

**Figure S6** NMDS ordination of arboreal arthropod composition in collected tree samples among different habitats marked with symbols and colours (forest = green triangles, orchard = yellow squares, urban sites = black crosses). The upper part shows sample ordination with spider diagrams and 99% confidence ellipses. The lower part shows the ordination of detected arthropod families.

Statistics: NMDS stress = 0.13; permutation analysis:  $F = 1.98$ ,  $R^2 = 0.22$ ,  $p = 0.020$  (PERMANOVA)

**Table S14** Frequency of occurrence (FO) of taxonomic groups from arboreal arthropods (black numbers) collected in the breeding habitats of Blue Tits in comparison to FO in nestling diet samples (red numbers). Taxa with FO  $\geq 50$  are marked bold

| class      | order      | family        | forest             | orchard            | urban                |
|------------|------------|---------------|--------------------|--------------------|----------------------|
|            |            |               | n=5 (17)           | n=6 (19)           | n=6 (20)             |
| Arachnida  | Araneae    | Anyphaenidae  | 40.0 (11.8)        | 0 (5.3)            | 0 (20.0)             |
| Arachnida  | Araneae    | Araneidae     | 0 (17.6)           | 0 (21.1)           | 0                    |
| Arachnida  | Araneae    | Clubionidae   | 20.0               | 16.7 (5.3)         | 0 (10.0)             |
| Arachnida  | Araneae    | Dictynidae    | 0.0                | 33.3               | 33.3                 |
| Arachnida  | Araneae    | Linyphiidae   | 40.0               | 0                  | 0                    |
| Arachnida  | Araneae    | Philodromidae | <b>60.0 (47.1)</b> | <b>83.3 (21.1)</b> | 16.7 ( <b>55.0</b> ) |
| Arachnida  | Araneae    | Salticidae    | 0.0                | 16.7               | 0                    |
| Arachnida  | Araneae    | Theridiidae   | <b>60.0</b>        | <b>50.0 (10.5)</b> | 33.3 (10.0)          |
| Arachnida  | Araneae    | Thomisidae    | 0 (47.1)           | 0 (26.3)           | 0 (20.0)             |
| Diplopoda  | Polyxenida | Polyxenidae   | 0.0                | 16.7               | 0                    |
| Entognatha | Collembola | Entomobryidae | 20.0               | 0                  | 0                    |
| Insecta    | Coleoptera | Anobiidae     | 20.0               | 0                  | 0                    |
| Insecta    | Coleoptera | Apionidae     | 0.0                | 16.7               | 0                    |
| Insecta    | Coleoptera | Buprestidae   | 0.0                | 0                  | 0 (5.0)              |
| Insecta    | Coleoptera | Coccinellidae | 0.0                | 16.7               | 16.7                 |
| Insecta    | Coleoptera | Curculionidae | 40.0               | <b>83.3 (10.5)</b> | <b>50 (15.0)</b>     |
| Insecta    | Coleoptera | Elateridae    | 20.0               | 0                  | 0                    |
| Insecta    | Coleoptera | Latridiidae   | 40.0               | <b>83.3</b>        | 33.3                 |
| Insecta    | Coleoptera | Melyridae     | 0.0                | 16.7               | 33.3                 |
| Insecta    | Coleoptera | Nitidulidae   | 0.0                | 0                  | 16.7                 |
| Insecta    | Coleoptera | Scraptiidae   | 0.0                | 0                  | 16.7                 |
| Insecta    | Coleoptera | Tenebrionidae | 0 (11.8)           | 0                  | 0                    |
| Insecta    | Diptera    | Cecidomyiidae | 0.0                | 0                  | 16.7                 |
| Insecta    | Diptera    | Chironomidae  | 0.0                | 16.7               | 0                    |
| Insecta    | Diptera    | Hybotidae     | 0.0                | 0                  | 16.7                 |
| Insecta    | Diptera    | Muscidae      | 0 (11.8)           | 0                  | 0 (5.0)              |
| Insecta    | Diptera    | Pipunculidae  | 0.0                | 0                  | 16.7                 |
| Insecta    | Diptera    | Platypezidae  | 0.0                | 0                  | 16.7                 |
| Insecta    | Diptera    | Sciaridae     | 20.0               | 0                  | 0                    |
| Insecta    | Diptera    | Syrphidae     | 0 (11.8)           | 16.7 (5.3)         | 0 (5.0)              |
| Insecta    | Diptera    | Tachinidae    | 0 ( <b>58.8</b> )  | 0 (47.4)           | 0 (25.0)             |

|         |              |                |                  |                    |                    |
|---------|--------------|----------------|------------------|--------------------|--------------------|
| Insecta | Hemiptera    | Aphididae      | <b>60 (17.6)</b> | <b>66.7 (26.3)</b> | <b>50.0 (30.0)</b> |
| Insecta | Hemiptera    | Cicadellidae   | 20.0             | 0                  | <b>66.7</b>        |
| Insecta | Hemiptera    | Cixiidae       | 0.0              | 16.7               | 0                  |
| Insecta | Hemiptera    | Miridae        | <b>0 (17.6)</b>  | <b>66.7 (5.3)</b>  | <b>50 (15.0)</b>   |
| Insecta | Hemiptera    | Pentatomidae   | 0.0              | 33.3               | <b>0 (5.0)</b>     |
| Insecta | Hymenoptera  | Apidae         | <b>0 (5.9)</b>   | 0                  | 0                  |
| Insecta | Hymenoptera  | Bethylidae     | 0.0              | 16.7               | 0                  |
| Insecta | Hymenoptera  | Braconidae     | <b>20 (11.8)</b> | <b>16.7 (47.4)</b> | <b>0 (45.0)</b>    |
| Insecta | Hymenoptera  | Cynipidae      | 20.0             | 0                  | 16.7               |
| Insecta | Hymenoptera  | Formicidae     | 0.0              | 33.3               | 0                  |
| Insecta | Hymenoptera  | Ichneumonidae  | 0.0              | <b>0 (5.3)</b>     | 0                  |
| Insecta | Hymenoptera  | Tenthredinidae | <b>20 (23.5)</b> | <b>16.7 (52.6)</b> | <b>0 (35.0)</b>    |
| Insecta | Lepidoptera  | Chimabachidae  | <b>0 (17.6)</b>  | 0                  | 0                  |
| Insecta | Lepidoptera  | Coleophoridae  | 0.0              | 16.7               | 16.7               |
| Insecta | Lepidoptera  | Crambidae      | 0.0              | <b>0 (5.3)</b>     | 0                  |
| Insecta | Lepidoptera  | Drepanidae     | <b>0 (29.4)</b>  | <b>0 (5.3)</b>     | 0                  |
| Insecta | Lepidoptera  | Erebidae       | <b>60 (58.8)</b> | <b>0 (21.1)</b>    | <b>0 (10.0)</b>    |
| Insecta | Lepidoptera  | Geometridae    | <b>60 (94.1)</b> | <b>33.3 (89.5)</b> | <b>66.7 (85.0)</b> |
| Insecta | Lepidoptera  | Lasiocampidae  | <b>0 (58.8)</b>  | <b>16.7 (78.9)</b> | <b>0 (90.0)</b>    |
| Insecta | Lepidoptera  | Lycaenidae     | <b>0 (23.5)</b>  | <b>0 (5.3)</b>     | <b>0 (25.0)</b>    |
| Insecta | Lepidoptera  | Noctuidae      | <b>60 (76.5)</b> | <b>16.7 (52.6)</b> | <b>0 (85.0)</b>    |
| Insecta | Lepidoptera  | Notodontidae   | <b>0 (17.6)</b>  | <b>0 (5.3)</b>     | <b>0 (25.0)</b>    |
| Insecta | Lepidoptera  | Pyrilidae      | <b>0 (35.3)</b>  | <b>0 (21.1)</b>    | <b>0 (30.0)</b>    |
| Insecta | Lepidoptera  | Tortricidae    | <b>40 (88.2)</b> | <b>50.0 (94.7)</b> | <b>16.7 (70.0)</b> |
| Insecta | Lepidoptera  | Yponomeutidae  | 0.0              | 16.7               | <b>0 (5.0)</b>     |
| Insecta | Lepidoptera  | Ypsolophidae   | <b>60 (11.8)</b> | <b>0 (15.8)</b>    | <b>0 (35.0)</b>    |
| Insecta | Orthoptera   | Acrididae      | <b>0 (5.9)</b>   | 0                  | <b>0 (15.0)</b>    |
| Insecta | Orthoptera   | Tettigoniidae  | 40.0             | 16.7               | 0                  |
| Insecta | Psocodea     | Caeciliusidae  | 20.0             | 0                  | 0                  |
| Insecta | Psocodea     | Ectopsocidae   | 0.0              | 33.3               | 33.3               |
| Insecta | Thysanoptera | indet.         | 20.0             | 0                  | 0                  |

---



**Table S15** Frequency of occurrence (% FO) of taxonomic groups from arboreal arthropods (black numbers) collected in the breeding habitats of Great Tits in comparison to % FO in nestling diet samples (red numbers). Taxa with FO  $\geq 50$  are marked bold

| class      | order      | family        | forest            | orchard          | urban       |
|------------|------------|---------------|-------------------|------------------|-------------|
|            |            |               | n=5 (19)          | n=6 (20)         | n=6 (18)    |
| Arachnida  | Araneae    | Anyphaenidae  | 40.0 (15.8)       | 0 (20)           | 0           |
| Arachnida  | Araneae    | Araneidae     | 0 (5.3)           | 0                | 0           |
| Arachnida  | Araneae    | Clubionidae   | 20.0              | 16.7 (5)         | 0 (11.1)    |
| Arachnida  | Araneae    | Dictynidae    | 0                 | 33.3             | 33.3        |
| Arachnida  | Araneae    | Linyphiidae   | 40.0              | 0                | 0           |
| Arachnida  | Araneae    | Philodromidae | <b>60.0 (5.3)</b> | <b>83.3 (10)</b> | 16.7 (16.7) |
| Arachnida  | Araneae    | Salticidae    | 0                 | 16.7             | 0           |
| Arachnida  | Araneae    | Theridiidae   | <b>60.0 (5.3)</b> | 50 (5)           | 33.3 (5.6)  |
| Arachnida  | Araneae    | Thomisidae    | 0 (26.3)          | 0 (15)           | 0 (11.1)    |
| Diplopoda  | Polyxenida | Polyxenidae   | 0                 | 16.7             | 0           |
| Entognatha | Collembola | Entomobryidae | 20.0              | 0                | 0           |
| Insecta    | Coleoptera | Anobiidae     | 20.0              | 0                | 0           |
| Insecta    | Coleoptera | Apionidae     | 0                 | 16.7             | 0           |
| Insecta    | Coleoptera | Buprestidae   | 0                 | 0 (5)            | 0 (5.6)     |
| Insecta    | Coleoptera | Coccinellidae | 0                 | 16.7             | 16.7        |
| Insecta    | Coleoptera | Curculionidae | 40.0              | <b>83.3</b>      | <b>50</b>   |
| Insecta    | Coleoptera | Elateridae    | 20.0              | 0                | 0 (5.6)     |
| Insecta    | Coleoptera | Latridiidae   | 40.0              | <b>83.3</b>      | 33.3        |
| Insecta    | Coleoptera | Melyridae     | 0                 | 16.7             | 33.3        |
| Insecta    | Coleoptera | Nitidulidae   | 0                 | 0                | 16.7        |
| Insecta    | Coleoptera | Scraptiidae   | 0                 | 0                | 16.7        |
| Insecta    | Diptera    | Asilidae      | 0 (5.3)           | 0                | 0           |
| Insecta    | Diptera    | Cecidomyiidae | 0                 | 0                | 16.7        |
| Insecta    | Diptera    | Chironomidae  | 0                 | 16.7             | 0           |
| Insecta    | Diptera    | Hybotidae     | 0                 | 0                | 16.7        |
| Insecta    | Diptera    | Phoridae      | 0                 | 0 (5.0)          | 0           |
| Insecta    | Diptera    | Pipunculidae  | 0                 | 0                | 16.7        |
| Insecta    | Diptera    | Platypezidae  | 0                 | 0                | 16.7        |
| Insecta    | Diptera    | Psychodidae   | 0                 | 0 (5.0)          | 0           |
| Insecta    | Diptera    | Sciaridae     | 20.0              | 0                | 0           |
| Insecta    | Diptera    | Syrphidae     | 0 (5.3)           | 16.7             | 0 (5.6)     |

|         |              |                |                    |                  |                    |
|---------|--------------|----------------|--------------------|------------------|--------------------|
| Insecta | Diptera      | Tachinidae     | 0 (21.1)           | 0 (15)           | 0 (5.6)            |
| Insecta | Hemiptera    | Aphididae      | <b>60.0 (10.5)</b> | <b>66.7 (30)</b> | <b>50 (16.7)</b>   |
| Insecta | Hemiptera    | Cicadellidae   | 20.0               | 0                | <b>66.7</b>        |
| Insecta | Hemiptera    | Cixiidae       | 0                  | 16.7             | 0                  |
| Insecta | Hemiptera    | Miridae        | 0                  | <b>66.7 (10)</b> | <b>50 (5.6)</b>    |
| Insecta | Hemiptera    | Pentatomidae   | 0                  | 33.3             | 0                  |
| Insecta | Hymenoptera  | Apidae         | 0                  | 0 (10)           | 0 (5.6)            |
| Insecta | Hymenoptera  | Bethylidae     | 0                  | 16.7             | 0                  |
| Insecta | Hymenoptera  | Braconidae     | 20.0 (36.8)        | 16.7 (40)        | 0 (61.1)           |
| Insecta | Hymenoptera  | Cynipidae      | 20.0               | 0                | 16.7               |
| Insecta | Hymenoptera  | Formicidae     | 0                  | 33.3             | 0                  |
| Insecta | Hymenoptera  | Tenthredinidae | 20.0 (21.1)        | 16.7 (40)        | 0 (50)             |
| Insecta | Lepidoptera  | Coleophoridae  | 0                  | 16.7             | 16.7               |
| Insecta | Lepidoptera  | Drepanidae     | 0 (15.8)           | 0 (15)           | 0                  |
| Insecta | Lepidoptera  | Erebidae       | <b>60.0 (57.9)</b> | 0 (20)           | 0 (27.8)           |
| Insecta | Lepidoptera  | Geometridae    | <b>60.0 (78.9)</b> | 33.3 (80)        | <b>66.7 (66.7)</b> |
| Insecta | Lepidoptera  | Lasiocampidae  | 0 (94.7)           | 16.7 (90)        | 0 (100)            |
| Insecta | Lepidoptera  | Lycaenidae     | 0 (5.3)            | 0 (10)           | 0 (5.6)            |
| Insecta | Lepidoptera  | Noctuidae      | <b>60.0 (57.9)</b> | 16.7 (80)        | 0 (33.3)           |
| Insecta | Lepidoptera  | Notodontidae   | 0 (21.1)           | 0 (15)           | 0 (16.7)           |
| Insecta | Lepidoptera  | Pyrilidae      | 0 (5.3)            | 0 (5)            | 0                  |
| Insecta | Lepidoptera  | Tortricidae    | 40.0 (78.9)        | <b>50 (60)</b>   | 16.7 (55.6)        |
| Insecta | Lepidoptera  | Yponomeutidae  | 0                  | 16.7             | 0                  |
| Insecta | Lepidoptera  | Ypsolophidae   | <b>60.0 (15.8)</b> | 0 (35)           | 0 (44.4)           |
| Insecta | Neuroptera   | Hemerobiidae   | 0                  | 0                | 0 (15.0)           |
| Insecta | Orthoptera   | Acrididae      | 0 (5.9)            | 0                | 0 (15)             |
| Insecta | Orthoptera   | Tettigoniidae  | 40.0               | 16.7             | 0                  |
| Insecta | Psocodea     | Caeciliusidae  | 20.0               | 0                | 0                  |
| Insecta | Psocodea     | Ectopsocidae   | 0                  | 33.3             | 33.3               |
| Insecta | Thysanoptera | indet.         | 20.0               | 0                | 0                  |

---
